1 **Orientia tsutsugamushi: analysis of the mobilome of a highly fragmented and**  
2 **repetitive genome reveals ongoing lateral gene transfer in an obligate intracellular**  
3 **bacterium.**

4

5 Suparat Giengkam<sup>a</sup>, Chitrasak Kullapanich<sup>a</sup>, Jantana Wongsantichon<sup>a</sup>, Haley E. Adcox<sup>b</sup>,  
6 Joseph J. Gillespie<sup>c</sup> and Jeanne Salje<sup>a, d, #</sup>

7

8 Mahidol-Oxford Tropical Medicine Research Unit, Faculty of Tropical Medicine, Mahidol  
9 University, Bangkok, Thailand<sup>a</sup>;

10 Department of Microbiology and Immunology, Virginia Commonwealth University Medical  
11 Center, School of Medicine, Richmond, Virginia, USA<sup>b</sup>;

12 Department of Microbiology and Immunology, School of Medicine, University of Maryland  
13 Baltimore, MD 21201<sup>c</sup>;

14 Department of Pathology, Department of Biochemistry, Cambridge Institute for Medical  
15 Research, University of Cambridge, UK;

16 Public Health Research Institute, Rutgers the State University of New Jersey, Newark, USA<sup>e</sup>

17

18

19 # Address correspondence to Jeanne Salje: [jss53@cam.ac.uk](mailto:jss53@cam.ac.uk)

20

21 **Abstract (250 words)**

22 The rickettsial human pathogen *Orientia tsutsugamushi* (Ot) is an obligate intracellular  
23 Gram-negative bacterium with one of the most highly fragmented and repetitive genomes of  
24 any organism. Around 50% of its ~2.3 Mb genome is comprised of repetitive DNA that is  
25 derived from the highly proliferated Rickettsiales amplified genetic element (RAGE). RAGE  
26 is an integrative and conjugative element (ICE) that is present in a single Ot genome in up to  
27 92 copies, most of which are partially or heavily degraded. In this report, we analysed  
28 RAGEs in eight fully sequenced Ot genomes and manually curated and reannotated all  
29 RAGE-associated genes, including those encoding DNA mobilisation proteins, P-type (*vir*)  
30 and F-type (*tra*) type IV secretion system (T4SS) components, Ankyrin repeat- and  
31 tetratricopeptide repeat-containing effectors, and other piggybacking cargo. Originally, the  
32 heavily degraded Ot RAGEs led to speculation that they are remnants of historical ICEs that  
33 are no longer active. Our analysis, however, identified two Ot genomes harbouring one or  
34 more intact RAGEs with complete F-T4SS genes essential for mediating ICE DNA transfer.  
35 As similar ICEs have been identified in unrelated rickettsial species, we assert that RAGEs  
36 play an ongoing role in lateral gene transfer within the Rickettsiales. Remarkably, we also  
37 identified in several Ot genomes remnants of prophages with no similarity to other rickettsial  
38 prophages. Together these findings indicate that, despite their obligate intracellular lifestyle  
39 and host range restricted to mites, rodents and humans, Ot genomes are highly dynamic  
40 and shaped through ongoing invasions by mobile genetic elements and viruses.

41

42 **Keywords (3-10)**

43 *Orientia tsutsugamushi*, Rickettsiales, obligate intracellular bacteria, intracellular pathogens,  
44 mobile genetic elements, comparative genomics, bacteriophage, integrative and conjugative  
45 elements, lateral gene transfer.

46

47

48 **Importance**

49 Obligate intracellular bacteria, or those only capable of growth inside other living cells, have  
50 limited opportunities for horizontal gene transfer with other microbes due to their isolated  
51 replicative niche. The human pathogen *Orientia tsutsugamushi* (Ot), an obligate intracellular  
52 bacterium causing scrub typhus, encodes an unusually high copy number of a ~40 gene  
53 mobile genetic element that typically facilitates genetic transfer across microbes. This  
54 proliferated element is heavily degraded in Ot and previously assumed to be inactive. Here,  
55 we conducted detailed analysis of this element in eight Ot strains and discovered two strains  
56 with at least one intact copy. This implies that the element is still capable of moving across  
57 Ot populations and suggests that the genome of this bacterium may be even more dynamic  
58 than previously appreciated. Our work raises questions about intracellular microbial  
59 evolution and sounds an alarm for gene-based efforts focused on diagnosing and  
60 combatting scrub typhus.

61

## 62 Introduction

63 ***Orientia tsutsugamushi* (Ot)** is an obligate intracellular Gram-negative bacterium that is a  
64 symbiont of trombiculid mites and causes the vector-borne human disease scrub typhus. Ot  
65 is a member of the alphaproteobacterial order Rickettsiales, which contains three well-  
66 studied families: Anaplasmataceae, Rickettsiaceae and Midichloriaceae<sup>1,2</sup>, as well as four  
67 lesser-known families that have recently been described (Deianiraeaceae, Mitibacteraceae,  
68 Gamibacteraceae, and Athabascaceae)<sup>3-5</sup>. As a lineage within Rickettsiaceae, genus  
69 *Orientia* also includes “*Candidatus Orientia chiloensis*”, which has recently been identified as  
70 an endemic species in Chile<sup>6</sup>, and *Candidatus O. chuto*, which was isolated from a patient in  
71 Dubai<sup>7</sup>. There is extensive strain diversity within the Ot species, which can be found in  
72 rodents, mites and human patients across Southeast Asia. While strain diversity  
73 corresponds to differences in virulence in patients and in animal infection models, the  
74 molecular basis of these differences in virulence are not well understood. Ot strains are  
75 often classified according to serotype groupings, which are organised based on the human  
76 serological response to the highly antigenic surface protein TSA56. Major serotype groups  
77 are named after type strains and include Karp, Kato, Gilliam, Japanese-Gilliam, TA763,  
78 Saitama, Kuroki, Kawasaki and Shimokoshi.

79

80 At around 2-2.5 Mb, the genome of Ot is almost double the size of most Rickettsiales  
81 genomes and is one of the most fragmented and repetitive bacterial genomes reported to  
82 date<sup>8,9</sup>. With almost 50% of the genome comprised of repetitive DNA sequences, many  
83 experimental approaches are challenging: i.e. primer design, gene and genome sequencing,  
84 gene prediction and annotation, and comparative genomics. Complete genome sequences  
85 of two strains, Boryong and Ikeda, were published in 2008 using short read sequencing and  
86 bacterial artificial chromosome cloning<sup>8,9</sup>. An additional six strains (Karp, Kato, Gilliam,  
87 TA686, UT76, UT176) were fully sequenced in 2018 using long read PacBio technology<sup>10</sup>. A  
88 comparison of these eight genomes enabled the identification of 657 core genes and an

89 open pangenome that is heavily characterized by gene duplication and pseudogenisation  
90 rather than the import of novel genes<sup>10</sup>.

91

92 The Ot genome is dominated by an **integrative and conjugative element (ICE)**, called  
93 **Rickettsiales amplified genetic element (RAGE)**<sup>8,9,11</sup>, that has proliferated rampantly  
94 throughout the genome and is present in over 70 copies. RAGEs encode numerous  
95 repeated and pseudogenized genes, as well as single copy cargo genes that appear to be  
96 important for bacterial growth and pathogenesis. Whilst the high number of RAGE copies in  
97 the Ot genome remains unmatched, similar RAGEs have been described in several other  
98 *Rickettsia* species: *Rickettsia bellii* (single intact copy<sup>12</sup>), *Rickettsia buchneri* (7 complete or  
99 near-complete genomic copies, and two plasmid encoded copies)<sup>11</sup>, *Rickettsia massiliensis*  
100 (single intact copy<sup>13</sup>), *R. parkeri* str. Atlantic Rainforest (single intact copy<sup>14</sup>), *R. felis* str.  
101 LSU-Lb (one plasmid encoded copy<sup>15</sup>) and *R. peacockii* (one partially degraded copy)<sup>16</sup>. In  
102 Ot, the ICE has not been controlled by the bacterial host and the RAGE has replicated to  
103 high levels in the genome<sup>9,10,17</sup>. The reasons for the differential fate of the RAGEs in  
104 Rickettsiaceae are unknown, but the small effective population size as well as the presence  
105 of population bottlenecks in obligate intracellular bacteria likely explain why it has had the  
106 ability to proliferate without strong negative selection in at least some rickettsial species.

107

108 Here, we present a thorough Ot phylogenomics analysis and re-annotation of the RAGEs  
109 and their cargo genes in eight strains: Gilliam, Boryong, UT76, UT176, Karp, Kato, Ikeda  
110 and TA686. We delineate the start and stop sites of all the intact and degraded RAGEs,  
111 allowing us to identify **inter-RAGE (IR)** regions with conserved clusters of genes. We further  
112 describe complete RAGEs in two Ot genomes (Kato and Gilliam). Finally, we annotate and  
113 classify the genes associated with DNA mobilisation and divergent **type IV secretion**  
114 **systems (T4SSs)**, as well as the numerous multicopy cargo genes within the RAGEs,  
115 including those encoding **Ankyrin-repeat containing proteins (Anks)** and  
116 **tetratricopeptide repeat containing proteins (TPRs)**, which are putative secreted

117 effectors. This detailed disentangling of the superfluous RAGE-dominated mobilome from  
118 the core and accessory Ot genome is expected to enlighten research on Ot biology and  
119 overall genome evolution in obligate intracellular bacteria.

120

## 121 **Results and discussion**

### 122 **RAGE and IR regions**

123 The RAGE is an ICE that is present in Ot and certain other Rickettsiales genomes. The  
124 degree of amplification and degradation of RAGE in the Ot genome is so extensive - making  
125 up around 50% of the Ot genome in 71-93 distinct genomic regions – that the beginning and  
126 end sites of RAGEs cannot be easily identified by visual inspection. Here, we established  
127 objective criteria for the classification of genes into Ot RAGEs, and manually delineated  
128 each RAGE in the eight Ot strains in our study.

129

130 First, one or more copies of each of the following mobilisation genes must be present:  
131 integrase (*int*), transposase (*tnp*), F-type T4SS genes (*tra/trb*), and relaxosome (*tra*).  
132 Second, one or more previously defined cargo or regulation genes<sup>9</sup> must be present:  
133 membrane proteins (reclassified here as Ot\_RAGE\_membrane protein, see below), DNA  
134 adenine methyltransferase (*dam*), DNA helicase, ATP-binding proteins (*mrp*), histidine  
135 kinases, SpoT-related proteins (synthetase and/or hydrolase domains), HNH endonuclease,  
136 peroxiredoxin, Anks, and TPRs. Third, the RAGE region begins with the first RAGE-  
137 associated gene and continues until a previously defined core gene<sup>10</sup> is reached. A run of  
138 core genes is classified as an IR element. Fourth, given the abundance of genes encoding  
139 **hypothetical proteins (HPs)** within RAGEs, those located between mobilisation/cargo  
140 RAGE genes are classified as being part of that RAGE. However, HP-encoding genes  
141 located between RAGE mobilisation/cargo genes and Ot core genes that cannot be resolved  
142 as being within RAGE or IR regions are classified as isolated HP-encoding genes. Fifth and  
143 final, single or multiple mobilisation or cargo RAGE genes are classified as isolated mobile

144 genes or cargo genes, respectively. Some new cargo genes were identified by virtue of  
145 residing within RAGE regions in most or all genomes and these are discussed below.

146

147 In this way the entire genome of each Ot strain was classified into the following regions:  
148 RAGE region, IR region, isolated HP-encoding gene, isolated mobilisation gene, and  
149 isolated cargo gene (**Supplementary Dataset 1**). Using these criteria, we identified 71-93  
150 RAGEs in the eight analysed genomes (**Fig. 1A, B**). The patterns of RAGE fragmentation  
151 and pseudogenization varied extensively between strains and it was not possible to map  
152 RAGEs between strains (**Fig. 1A**). This implies that RAGEs entered Ot strains one or more  
153 times as intact elements and subsequently underwent replication, pseudogenisation and  
154 recombination in independent trajectories.

155

156 Most RAGEs in Ot are degraded, both in terms of either completely lacking RAGE-  
157 associated genes or retaining genes that have been truncated or fragmented into predicted  
158 pseudogenes. A previous study found that the Ot strain Ikeda genome lacked any complete  
159 RAGES<sup>9</sup>. We assessed whether any of the strains in our analysis encoded complete  
160 RAGEs, defined as containing a full set of mobilisation genes and additional cargo genes as  
161 outlined in previous analyses<sup>9</sup>. All the strains in our analysis, with the notable single  
162 exception of Ikeda, encoded one or more complete set of RAGE genes (**Fig. 1B**). However,  
163 most of those RAGEs contained one or more mobilisation genes that were truncated.  
164 Accordingly, we carried out sequence alignments to define each RAGE gene as being full-  
165 length, truncated (containing one or more identifiable domains) or degraded (containing no  
166 identifiable complete domains). We then assessed whether any strains contained complete  
167 RAGEs with intact, full-length genes (**Fig. 1B**). We found that two strains, Gilliam and Kato,  
168 encoded complete RAGEs with full length mobilisation genes (**Fig. 1C**). This suggests that  
169 these strains may have obtained these elements recently and that they may be capable of  
170 mobilisation. ICEs normally have a preferred integration site, often within tRNA genes<sup>11</sup>, as

171 observed for *Rickettsia* species<sup>18</sup>, Despite our discovery of complete RAGEs in these Ot  
172 genomes, no identifiable integration sites could be determined.

173

174 We previously used RNA sequencing analysis and comparative genomics to show that,  
175 despite the lack of synteny between Ot strains driven by the prolific RAGEs, small groups of  
176 proximate genes were transcribed at similar levels and maintained synteny across strains<sup>19</sup>.  
177 This demonstrates selection for gene order at the local level despite it being absent at a  
178 global level across Ot genomes. To further identify gene groups evolving under strong  
179 selective constraints relative to superfluous RAGEs, we analysed the IR regions, which  
180 harbour the majority of core Ot genes (**Fig. 1A**). Remarkably, this revealed 84 IR regions,  
181 ranging in length from 2 to 27 genes, most of which were conserved across all strains (**Fig.**  
182 **1B**). Identification of these conserved IR gene groups illuminates highly conserved  
183 microsynteny that may encompass functionally linked genes sharing expression and/or  
184 regulatory programs.

185

### 186 **Single copy cargo genes**

187 The delineation of Ot genomes into RAGE and IR regions enabled us to better characterize  
188 RAGE cargo genes (**Fig. 2A, B**). In addition to the group of highly replicated multicopy cargo  
189 genes already described as RAGE components (discussed below), we identified numerous  
190 single copy genes previously overlooked for their occurrence within RAGEs (**Fig. 2A**). These  
191 include genes involved in fundamental processes of bacterial physiology and metabolism,  
192 e.g., tyrosine tRNA ligase (*tyrS*), RNA polymerase subunit omega (*rpoZ*), and the ClpP  
193 protease (*clpP*), as well as genes encoding predicted secretory effectors likely involved in  
194 interactions with host cells, including phospholipase D (*pld*) and autotransporter proteins  
195 ScaA and ScaC (*scaA*, *scaC*) in all genomes, and ScaB (*scaB*, Boryong), ScaF (*scaF*,  
196 TA686) and ScaG (*scaG*, TA686) in individual strains. As many of these single copy genes  
197 have orthologs in other bacterial species that lack the RAGEs, it is likely that they were not  
198 introduced by mobile genetic elements. Rather, their current presence within RAGEs



199 indicates they were probably incorporated into RAGE via recombination. However, a case-  
200 by-case basis may reveal certain conserved genes shuttling between Ot genomes via RAGE  
201 mobilisation. For instance, despite their conservation in all *Rickettsia* genomes, genes  
202 encoding secreted effectors and metabolite transporters were previously found piggybacking  
203 on RAGEs in the *R. buchneri* genome, illustrating the ability for RAGE to shuttle rickettsial  
204 genes important for the obligate intracellular lifestyle<sup>11</sup>.

205

### 206 **Highly abundant multi-copy cargo genes**

207 Analysis of RAGE-associated cargo genes revealed 16 genes or (gene groups) present in  
208 numerous copies in all eight Ot genomes (**Fig. 2B**). Gene groups included membrane  
209 proteins, Dam DNA methyltransferases, DNA helicases, **multidrug resistance proteins**  
210 (**MRP**) and histidine kinases, SpoT hydrolase and synthetases, hypothetical/uncharacterized  
211 genes, mobile genetic elements (i.e., insertion sequences, transposases, integrases, and  
212 reverse transcriptases), Anks, TPRs, and *vir*- and *tra*-type T4SS genes. All of these, except  
213 *vir*-type T4SS genes, have been identified as RAGE cargo genes in previous studies<sup>8,9,20,21</sup>.  
214 For each gene group we assessed (i) whether all the genes annotated as belonging to this  
215 category were paralogs of the same gene or whether multiple distinct genes were present  
216 within one group, and (ii) whether some or all genes within a group were truncated and not  
217 able to form a full-length protein and, where a functional domain was known, whether this  
218 domain was present or not. Genes involved in DNA mobilisation, effector proteins, and T4SS  
219 genes are discussed in dedicated sections below, whilst other multi-copy cargo genes are  
220 discussed here.

221

222 *Membrane proteins.* The eight Ot genomes encode 21-41 RAGE associated genes  
223 annotated as membrane proteins (**Fig. 3A, Supplementary Dataset 2**). Analyses revealed  
224 that each Ot strain encodes exactly one copy of three genes encoding proteins with analogy  
225 to characterized membrane proteins: the YccA modulator of protease FtsH, vitamin  
226 transporter Vut1 and a gene similar to the rhamnose transporter RhaT. The remaining 18-38

227 genes encode paralogs of a gene we call Ot\_RAGE\_membrane protein, ranging in length  
228 from 90 to 663 bp. This protein lacks homology to any non-Ot genes and no known domain  
229 could be identified. Thus, the function of this gene in Ot is unknown.

230

231 *DNA methyltransferases*. Ot genomes encode 18 to 34 genes with similarity to DNA adenine  
232 methyltransferase (*dam*), all of which are located within RAGES (**Fig. 3B**). Sequence  
233 alignments demonstrate that 8-26 are full length proteins, defined as being equal in length to  
234 *E. coli dam* and encoding all seven known domains. The Ot genomes encode an additional  
235 2-26 truncated *dam* genes where some domains are preserved, and fewer degraded copies  
236 with no identifiable domains. It is not known if these genes are functional, although previous  
237 studies<sup>19,22</sup> showed that they were not detected by proteomics analysis. They may have a  
238 specific role in methylation of RAGE during mobilisation and/or integration to protect from  
239 deleterious effects of single-stranded DNase activity.

240

241 *DNA helicases*. DNA helicases unwind double stranded DNA and function in DNA and RNA  
242 metabolism, with general roles in DNA replication, repair and recombination. We found that  
243 all strains of Ot encode exactly two full length copies of the DNA helicase UvrD, which is  
244 involved in DNA repair (**Fig. 3C**). One copy is located within a RAGE whilst the second is  
245 located within IR82. The DnaB family of helicases, by contrast, is more numerous and  
246 degraded in Ot genomes (**Fig. 3C**). This helicase is involved in DNA replication and is  
247 present in 36-52 copies, with 1-23 being full length and mostly located within RAGEs. Each  
248 genome encodes one full length copy located at the interface of IR46 and IR47, which is  
249 likely the ancestral non-RAGE paralog involved in genome replication. Other copies are  
250 undoubtedly associated with RAGE mobilisation. Our previous proteomics analysis<sup>19,22</sup>  
251 detected expression of a DnaB gene, but due to sequence similarities between numerous  
252 paralogs, it was not possible to determine which specific gene(s) was expressed. Given its  
253 role in DNA replication, however, it is expected that at least one paralog would be expressed  
254 and functional.

255

256 *MRPs and histidine kinases*. We identified around 100 genes in the Ot genomes that were  
257 annotated as MRPs or histidine kinases (**Fig. 2B, 3D, Supp. Fig. 1, Supplementary**  
258 **Dataset 3**), or were found to contain histidine kinase domains (e.g. the sodium/proline  
259 symporter PutP). MRPs are members of the **ATP-binding cassette (ABC)** transporter  
260 protein family and were annotated as MRPs based on the presence of a **histidine kinase**  
261 **ATPase domain (HATPase)**. Our analysis determined that two “MRP” proteins were distinct  
262 from all the other HATPase domain containing proteins in Ot: an MRP/NBP35 family ATP-  
263 binding protein and an ABC-membrane and AAA ATPase protein, both single copy in each  
264 genome. The former was located within an IR region (IR9) and the latter within RAGEs.  
265 Analysis of the remaining genes annotated as MRP/histidine kinases led us to identify  
266 several full-length orthologs of **two-component system (2CS)** histidine kinase genes.  
267 These include one histidine phosphotransferase gene (which does not contain an HATPase  
268 domain), one large hybrid sensor histidine kinase/response regulator gene and two 2CS  
269 histidine kinase genes (**Fig. 3D**). All were present in the same copy number and locations in  
270 each genome. Histidine phosphotransferase and the two 2CS sensor histidine kinase genes  
271 were consistently found in IR regions IR43, IR47, and IR63, respectively, whilst the hybrid  
272 sensor histidine kinase/response regulator gene was located within a RAGE. In our UT76  
273 proteomics dataset<sup>22</sup>, both the histidine phosphotransferase and the hybrid sensor histidine  
274 kinase/response regulator genes were detected, whilst the two sensor histidine kinase  
275 proteins were not (**Supplementary Dataset 1**). We also identified two copies of a histidine  
276 kinase domain containing sodium/pantothenate symporter, PanF, present in IR11 and IR55  
277 regions in each genome, as well as a sodium/proline symporter, PutP, present in 4-8 copies  
278 and distributed into both RAGEs and IRs. Analysis of our previous proteomics dataset  
279 showed that PanF was expressed in strain UT76 as was one copy of PutP located in IR49<sup>22</sup>  
280 (**Supplementary Dataset 1**). The remaining MRP/histidine kinase genes were paralogs of  
281 one another, containing an HATPase domain and being present in 45-113 copies per  
282 genome with various degrees of truncation (**Supp. Fig. 1**). We classified these as degraded

283 HATPase domain containing proteins when an intact HATPase domain could no longer be  
284 detected due to the short length of the gene (**Fig. 3D, Supp. Fig. 1, Supplementary**  
285 **Dataset 1, 3**).

286

287 *SpoT stringent response regulators*. SpoT is a bifunctional synthetase/hydrolase that is  
288 essential for inducing and regulating the stringent response in *E. coli* and other bacteria  
289 through mediating intercellular levels of alarmone, or (p)ppGpp<sup>23,24</sup>. Ot genomes encode 36-  
290 78 genes with homology to SpoT. We identified exactly one full length SpoT gene, present in  
291 an IR region (IR46), encoding both synthetase and hydrolase domains in all Ot genomes  
292 (**Fig. 3E**). This gene was the only SpoT homolog found to be expressed in our previous  
293 proteomics analysis and was shown to be upregulated in extracellular Ot, consistent with a  
294 role in transitioning between different bacterial states<sup>22</sup>. We also identified exactly one gene  
295 in each genome that encodes only the SpoT synthetase domain in addition to a long C-  
296 terminal domain of unknown function. We then identified 15-46 SpoT genes that lacked the  
297 synthetase domain yet encoded the intact hydrolase domain as well as a further 16-44 SpoT  
298 genes that were truncated or degraded such that a functional hydrolase domain was no  
299 longer present.. Finally, we identified 1-4 genes in some genomes in which hydrolase  
300 domains are fused to other genes. Most rickettsial genomes harbour 6-12 SpoT genes, with  
301 some of the abovementioned architectures present (data not shown). Curiously, bifunctional  
302 (complete hydrolase and synthetase domains) genes are typical of most other Rickettsiales  
303 species, though not common in *Rickettsia* species and absent from notable human  
304 pathogens (e.g., *R. prowazekii*, *R. typhi*, *R. rickettsii*, and *R. conorii*)<sup>11</sup>. Still, the tendency for  
305 all Rickettsiales genomes to retain numerous single domain SpoT genes, even when  
306 RAGEs are absent, implies their function in some aspect of the stringent response. The  
307 presence of such drastic numbers and diverse architectures of SpoT genes in Ot genomes  
308 relative to other rickettsial species is intriguing and deserving of future investigation.

309

310 *HPs*. The *Ot* strains harbour 308 to 547 genes per genome that are annotated as  
311 hypothetical or uncharacterized, of which about half are located within RAGEs (**Fig. 2B** and  
312 **3F and Supplementary Dataset 4**). We determined whether all the RAGE  
313 hypothetical/uncharacterized genes were paralogs of a single RAGE gene or if they encoded  
314 multiple different genes. Sequence alignments for all the genes annotated as hypothetical or  
315 uncharacterized in the Karp genome were performed, which revealed that the genes  
316 clustered into 24 groups (**Fig. 3F**) with 18 of these encoding genes carrying known protein  
317 domains. Those without known domains were named RAGE\_hypo\_Gr1-7, with groups 1-6  
318 encoding a domain of unknown function, and group 7 combining all remaining HP genes  
319 with no identifiable known domains. Three of these genes with known domains were present  
320 in exactly one copy in all genomes and encode: a phage portal protein, a zinc ribbon  
321 domain, and a rhodanese homology domain. Another single-copy gene found in all eight *Ot*  
322 genomes carries a domain of unknown function (DUF155). Furthermore, hypothetical genes  
323 containing a DnaA N-terminal domain were identified in 10-23 copies in all *Ot* genomes. In  
324 our prior study, one full length paralog, located in IR1 was expressed in UT76, whilst others  
325 were not detected<sup>22</sup> (**Supplementary Dataset 1**).

326

327 Other hypothetical/uncharacterized genes were distributed sporadically amongst the  
328 genomes. In order to get a sense of the distribution of the remaining RAGE-associated  
329 hypothetical genes that were not clustered into conserved groups, we analysed the  
330 remaining hypothetical genes in the RAGEs of the Karp genome only. There were no  
331 identifiable domains in any of these and the diversity was such that it was not possible to bin  
332 them into homologous groups. We annotated them all as belonging to a large and divergent  
333 25<sup>th</sup> group (RAGE\_hypo\_Gr7). While little can be inferred about the function of these  
334 hundreds of genes, it is likely that at least some of these play important roles in the biology  
335 of *Ot*.

336

337 **Putative effectors piggybacking on *Ot* RAGE**

338 *Anks*. The ankyrin repeat is one of the most common protein folds in nature, being  
339 widespread in eukaryotes and pervasive in many viruses and host-associated bacteria<sup>25,26</sup>.  
340 Ankyrin repeats are used to mediate a myriad of protein-protein interactions, and host-  
341 associated prokaryotes and viruses frequently express Anks to hijack or subvert host cell  
342 pathways that would be detrimental or beneficial to their survival<sup>27</sup>. Previously, several Ot  
343 Anks were shown to be secreted via the rickettsial **type I secretion system (T1SS)**<sup>28</sup>.  
344 Certain Ank effectors have been functionally characterized in strain Ikeda and shown to play  
345 important roles in host cell interactions<sup>28-32</sup>. However, a major challenge in comparing the  
346 host-pathogen cell biology of different Ot strains has been the difficulty assessing which  
347 Anks are most similar to those in other strains. This is important for determining the  
348 significance of Anks as species- versus strain-specific effectors underlying pathogenesis.

349

350 We defined a set of criteria for clustering Anks, with their subsequent characterisation within  
351 each Ot genome following the well described Ank repertoire of strain Ikeda<sup>9</sup>. We identified  
352 several new Ank groups in Ikeda, although some of these lack complete Ank repeats and  
353 are likely non-functional **Supplementary Dataset 5**). Our comparative analysis indicates Ot  
354 strains encode 47-66 Anks, with variability (67-94%) in the number of common vs. strain-  
355 specific proteins per genome (**Fig. 4A**). Ot Anks often harbour a single F-box domain, which  
356 are prominently known components of SCF (Skp1, Cullin1, F-box) ubiquitin ligase  
357 complexes but recent studies have described their participation in non-SCF protein-protein  
358 interactions involved in diverse eukaryotic functions?pathways?<sup>33</sup>. F-box-resembling PRANC  
359 (pox protein repeats of ankyrin-C-terminal) domains and coiled-coils were less frequently  
360 predicted.

361

362 Of the 54 orthologous groups of Ot Anks, all genomes were found to encode at least one  
363 copy of seven groups: Ank03, Ank08, Ank10, Ank11, Ank12, Ank20 and Ank24 (**Fig. 4B**).  
364 Ank03 is by far the most prominent Ank, being present in 4 to 32 copies in Ot genomes, with  
365 the other six families present in 1 to 4 copies (**Fig. 4B**). Curiously, while most Ot Anks are

366 predominantly found within RAGEs, Ank20 is encoded in an IR region (IR84) in all analysed  
367 Ot genomes. Collectively, these seven Anks likely carry out essential functions in Ot biology.  
368 However, each strain likely utilizes unique Ank arsenals throughout its lifecycle given that  
369 some of the less conserved Anks have characterized functional roles; e.g, Ank01 and Ank06  
370 of Ot str. Ikeda modulate NFkB transport to the nucleus<sup>31</sup>. As such, it is likely that there is  
371 functional redundancy between the Ank groups, with some of the 100 other Ank groups not  
372 found in Ikeda functioning similarly as Ank01 and Ank06 in genomes lacking these genes.

373

374 *TPRs*. The tetratricopeptide repeat is another protein motif that is commonly used in  
375 mediating inter-protein interactions, typically found in subunits of multi-protein complexes<sup>34</sup>.  
376 TPRs are widespread in Ot proteins (**Fig. 4C**), albeit with a lower number of copies per  
377 genome than Anks. Ot TPRs have been less characterised than the Ot Anks, with only one  
378 report demonstrating a role in inhibition of eukaryotic translation in Ot strain Boryong<sup>35</sup>. We  
379 compiled 21-48 TPRs per Ot genome and classified them into nine groups primarily based  
380 on within-protein location of tetratricopeptide repeats (**Fig. 4C, Supp. Fig. 2,**  
381 **Supplementary Dataset 5**). Whilst the positions were conserved within groups, the number  
382 of repeats was variable and indicated expansion and contraction of repeats, as well as  
383 processive gene degradation within each group (**Fig. 4D**). The prediction of SEC signal  
384 peptides in certain TPRs indicates at least some of these putative effectors may be secreted  
385 to the periplasm with possible translocation across the outer membrane, possibly via TolC  
386 as proposed for the RARP-1 effector of *R. typhi*<sup>36</sup>. Still, the lack of N-terminal secretion  
387 signals in most TPRs indicates other possible routes for TPR secretion that await  
388 characterisation.

389

### 390 **Mobile genetic elements associated with RAGE**

391 *Integrases*. ICEs, such as Ot RAGE, encode integrase genes to catalyse genomic  
392 integration, and conjugative genes (discussed in the next section) to catalyse horizontal  
393 gene transfer<sup>37</sup>. The Ot genomes analysed in this study encode 58-102 integrase genes

394 (**Fig. 5A**), of which only 3-13 per genome remain full length, consistent with progressive  
395 degradation of the Ot RAGE. Where present, the integrases are located at the start position  
396 of a RAGE (**Fig. 1C**). However, several integrase genes were located as isolated genes  
397 outside RAGE regions, reflecting the high mobility of these genes and the overall high  
398 recombination rates in Ot genomes.

399

400 *Transposable elements*. In addition to the OtRAGE, the Ot genome encodes two other types  
401 of transposable elements<sup>9</sup>: retrotransposons (group II introns) and DNA transposons. Whilst  
402 these are independent mobile genetic elements, they have been incorporated into the Ot  
403 RAGE regions, and it is likely that the different mobilizable elements impact each other's  
404 activity. Group II introns are self-splicing retrotransposons that catalyse their integration into  
405 genomes via an RNA intermediate, using an intron-encoded reverse transcriptase protein<sup>38</sup>.  
406 The Ot genomes encode 7-64 group II intron reverse transcriptase genes, although only  
407 UT76, Karp and TA686 encode full length genes, with the others being heavily degraded  
408 (**Fig. 5A**). All full-length reverse transcriptase genes were immediately followed by an HNH  
409 endonuclease gene likely required for catalysis.

410

411 Ot encodes several families of DNA transposons which have been previously classified in  
412 strain Ikeda<sup>9</sup>. This class of mobile elements is comprised of a transposase gene flanked by  
413 inverted repeat regions on either side, which together make up an **insertion sequence**  
414 (**IS**)<sup>39</sup>. Numerous families of IS have been identified in other bacteria. Given the large  
415 number of IS elements in each Ot genome and their highly degradative tendency, we selected  
416 two of the many frequently occurring IS genes, ISOt3 and ISOt5, to characterise in detail  
417 across all eight genomes (**Fig. 5A**). These were present in 0-120 (ISOt3) and 0-70 (ISOt5)  
418 full-length copies across the genomes. We also analysed the complete set of IS elements in  
419 one strain, Karp, and compared these with those previously predicted for str. Ikeda (**Fig.**  
420 **5B**). An example of the analysis of one IS element in Karp, ISOt1, shows the distribution of  
421 full length and degraded copies typical of IS families in all Ot genomes (**Fig. 5C**). We



422 identified the same set of IS elements that had previously been described in Ikeda<sup>9</sup> (**Fig. 5B,**  
423 **C**). We followed the classification and nomenclature established in Nakayaka et al<sup>9</sup>, in which  
424 mISOt1, mISOt2 and mISOt4 denotes “miniature” versions of elements containing the same  
425 terminal inverted repeat sequences as ISOt1, ISOt2 and ISOt4 respectively. Within the nine  
426 IS classes found in Karp, most were heavily degraded with some, such as IS630 family  
427 transposase ISOt3, having no remaining full-length elements. We identified an additional  
428 seven groups of transposase genes in Karp that were not part of IS elements (**Fig. 5B**).

429

430 Bacteriophages are another source of horizontally transferred genetic material. These are  
431 thought to be rare in obligate intracellular bacteria due to the isolated lifestyle, although there  
432 are exceptions such as the WO prophage that is widespread in *Wolbachia* populations<sup>40</sup>. We  
433 searched for the presence of prophages in the Ot genomes using the online search tool  
434 PHASTER<sup>41,42</sup> and identified remnants of prophage genetic material in all strains except for  
435 Boryong (**Fig. 5D, E; Supplementary Dataset 7**). By contrast, no prophage regions were  
436 identified in *Rickettsia conorii*, *Rickettsia rickettsia*, *Rickettsia prowazekii*, *Anaplasma*  
437 *phagocytophilum* or *Anaplasma marginale*, although two sites were detected in both the  
438 genome of *Wolbachia* endosymbiont of *Drosophila melanogaster* and *Rickettsia bellii*. This  
439 suggests that prophages are not universally circulating in Rickettsiales populations, but are  
440 present in selected species such as Ot, wolbachiae and *R. bellii*. Whilst many of the Ot  
441 prophage genes identified by PHASTER include transposase and integrase genes, which  
442 may be of ICE origin rather than phage origin, phage-specific genes including capsid and  
443 envelope proteins were also found. In addition to the identification of potential prophage  
444 regions found by PHASTER, isolated phage-related genes, such as the phage portal protein  
445 previously annotated as a hypothetical protein (Fig. 3F), are also present in the Ot genomes.  
446 Sequence similarity searches indicated low similarity to a range of diverse phage sequences  
447 from free-living bacteria indicating that either the prophages came from numerous sources,  
448 or that the sequences within each strain were sufficiently degraded so they have lost  
449 identifiable homology to one another.

450

#### 451 **RAGE mobilisation genes**

452 *F-T4SS*. The RAGE encodes a conjugative T4SS highly similar to the *F-T4SS* of the  
453 archetypal *F* plasmid of *E. coli* (*tra/trb*)<sup>8,9</sup>. Previous comparisons of the RAGE T4SS with that  
454 of the *E. coli* *F* plasmid showed that it encodes 14 proteins predicted to form the T4SS  
455 scaffold, some of which are analogous to components within P-type T4SSs<sup>18,43</sup> (**Fig. 6A, B,**  
456 **Supplementary Dataset 8**). While syntenic to the *E. coli* *tra/trb* T4SS, the RAGE T4SS  
457 lacks genes involved in the regulation of conjugation, as well as other assembly factors and  
458 lytic transglycosylases (**Fig. 6C**). In this way, the RAGE T4SS is a streamlined version of the  
459 canonical *F-T4SS*. The Ot RAGE T4SS is also highly similar in gene order and composition  
460 to *F-T4SS*s characterized in the RAGEs of *R. buchneri*<sup>11</sup>, *R. bellii*<sup>12</sup>, *R. felis*<sup>15</sup> and *R.*  
461 *massiliae*<sup>13</sup>. As with these prior reports, we also did not identify a gene encoding a pilin  
462 protein (typically *TraA* in *F-T4SS*s) in RAGE T4SSs, though it may be that a pilus is  
463 synthesized using a different pilin gene since the RAGE-harboring *R. bellii* forms large pili  
464 during host infection<sup>12</sup>. Experiments are needed to determine if the RAGE T4SS elaborates  
465 a pilus or functions pilus-less, as is noted for the P-T4SS of *Rickettsia* species<sup>43</sup>,  
466 *Neorickettsia risticii*<sup>44</sup>, and likely all *Rickettsiales*<sup>45</sup>. Another common peculiarity of these *F-*  
467 *T4SS*s is the split gene encoding *TraK*, the significance of which is unknown.

468

469 *Relaxosome*. The relaxosome of the *E. coli* *tra/trb* *F-T4SS* encodes one multifunctional  
470 relaxase, *Tral*, which excises and binds single-stranded plasmid DNA<sup>46</sup>. In contrast, the Ot  
471 RAGE carries three genes *tral*, *traA<sub>Ti</sub>* and *traD<sub>Ti</sub>* predicted to comprise the relaxosome that  
472 mobilises RAGE (**Fig. 6C**). *E. coli* *Tral* harbours four distinct domains required for nicking,  
473 binding, and unwinding DNA. By contrast, Ot *Tral* lacks a domain for nicking DNA and  
474 shares very limited similarity to *E. coli* *Tral*. However, Ot *TraA<sub>Ti</sub>* carries a *MobA*-like domain  
475 that cleaves single- and double-stranded DNA at specific sites<sup>47</sup>. Curiously, all of the  
476 domains encompassed by Ot *Tral* and *TraA<sub>Ti</sub>* proteins are found in a single *Rickettsia* RAGE  
477 protein, named *TraA<sub>Ti</sub>-I*, which is highly similar to both Ot *Tral* and *TraA<sub>Ti</sub>* but shares limited

478 similarity to *E. coli* TraI. As their annotation indicates, RAGE TraA<sub>Ti</sub> and TraD<sub>Ti</sub> are similar to  
479 relaxosome proteins of plasmid Ti of *Agrobacterium tumefaciens*, TraA and TraD, which are  
480 required for T-DNA translocation into plant cells via the *vir* T4SS<sup>48</sup>. The significance of  
481 different relaxosome structures between Ot and *Rickettsia* RAGEs is unclear, although *traA<sub>Ti</sub>*  
482 and *traD<sub>Ti</sub>* genes are common on *Rickettsia* plasmids even when RAGE are absent<sup>49</sup>. It may  
483 be multiple RAGE types exist in the rickettsial mobilome and are defined by their cognate  
484 relaxosomes. The presence of transposases flanking relaxosome genes in all complete Ot  
485 and *Rickettsia* RAGEs may also signify that RAGEs evolve by recombining different  
486 relaxosome cassettes into the conjugation and cargo genes.

487

488 *Proliferation of Ot RAGE mobilisation genes.* Aside from shared synteny and mobilisation  
489 gene composition, *Rickettsia* and Ot RAGEs have common insertion points for antidote  
490 genes of toxin-antidote modules and transposases (**Fig. 6C**). However, certain *Rickettsia*  
491 RAGEs have cargo genes inserted at different sites within the mobilisation genes<sup>11,15,18</sup>.  
492 Furthermore, a recent study annotated a RAGE from the *Tisiphia* endosymbiont of *Cimex*  
493 *lectularius* that harbours unique mobilisation genes and cargo gene insertion sites<sup>50</sup>. This  
494 indicates that RAGEs are far more diverse and widespread across Rickettsiales than  
495 previously appreciated. Still, most *Rickettsia* genomes either lack RAGE entirely or show  
496 minimal evidence for RAGE insertion near a common genomic position, tRNA<sup>Val-GAC</sup><sup>11</sup>. This  
497 is in stark contrast to the proliferated nature of RAGEs in Ot genomes.

498

499 The scattershot distribution of RAGE in Ot genomes is particularly evinced by the  
500 mobilisation gene clusters that are present in numerous copies within the plethora of  
501 RAGEs. We find that over 50% of the RAGE T4SS and relaxosome genes are present as  
502 truncated pseudogenes, and that some of these clusters encode only a subset of the 18  
503 possible Ot RAGE mobilisation genes (**Fig. 6D, E**). Given the high degree of  
504 pseudogenization, we sought to examine whether any strain encoded any RAGE  
505 mobilisation gene clusters containing a complete complement of full-length genes. We found

506 that Karp, Kato, Gilliam and UT76 encoded at least one complete RAGE mobilisation gene  
507 set, whilst Ikeda, Boryong, TA686 and UT176 did not (**Fig. 6D, E, Supp. Fig. 3, Dataset 7**).  
508 There was a positive correlation between strains containing complete sets of RAGE  
509 mobilisation gene sets and the total number of full-length mobilisation genes (**Fig. 6D, E**).  
510 Moreover, the complete RAGE mobilisation gene clusters in Gilliam and Kato were located  
511 within complete RAGE regions (**Fig. 1C, Fig. 6E, Supp. Fig. 3**). Whilst several genomes  
512 lack complete RAGE mobilisation gene clusters, all except Boryong encode at least one full  
513 length copy of each RAGE mobilisation gene, albeit not in a contiguous cluster. Therefore, it  
514 is possible that all strains except Boryong could assemble a functional F-type T4SS  
515 competent to mediate transfer of RAGEs.

516

#### 517 **The impact of pervasive mobile genetic elements on the Ot genome**

518 *P-T4SS*. Like other rickettsial species, Ot encodes a P-type T4SS related to the archetypal  
519 *vir* T4SS of the pTi plasmid of *A. tumefaciens*. Relative to *vir*, this **Rickettsiales** *vir*  
520 **homolog** (*rvh*) T4SS has distinct features, including the scattered distribution of *rvh* gene  
521 clusters, duplication of *rvhB8*, *rvhB9* and *rvhB4*, 3-5 copies of *rvhB6*, and no gene encoding  
522 an equivalent to the VirB5 minor pilin subunit<sup>51,52,45,51</sup> (**Fig. 7A,B**). These characteristics are  
523 nuanced: 1) RvhB4-II, RvhB8-II, and RvhB9-II carry atypical structural deviations from  
524 described VirB4, VirB8, and VirB9 family proteins, 2) RvhB6 proteins have large insertions  
525 flanking the VirB6-like membrane spanning region, and 3) a lack of a minor pilin subunit  
526 precludes formation of a T-pilus<sup>52,53</sup>. There is evidence that structurally different RvhB8-I and  
527 RvhB8-II proteins of *R. typhi* cannot dimerize<sup>53</sup>, which led to the hypothesis that divergent  
528 duplications may autoregulate effector secretion<sup>52</sup>. The recent identification of *rvh* genes in  
529 all seven Rickettsiales families implies a highly important function<sup>3,54</sup>. Thus, we assessed the  
530 properties of the Ot *rvh* T4SS in the face of its rampant mobile genetic element-induced  
531 genome shuffling.

532

533 A single set of *rvh* genes is present in all the Ot genomes analysed here and has features  
534 resembling those described in other Rickettsiales species (**Fig. 6A-C**). Interestingly, Ot  
535 shares two key characteristics with the *rvh* T4SS of distantly-related Anaplasmataceae  
536 species as opposed to that of closely-related *Rickettsia* species. First, while Ot lacks genes  
537 for a VirB5 protein and therefore cannot form extracellular pili used for cellular attachment, it  
538 encodes 2-3 copies of *rvhB2*, the major pilus subunit. Given that Ot lacks  
539 **lipopolysaccharide (LPS)** on its surface, multiple RvhB2 proteins may act as divergent  
540 surface antigens in a similar fashion previously posited for Anaplasmataceae species, which  
541 collectively lack LPS biosynthesis genes and have multiple *rvhB2* genes throughout their  
542 genomes<sup>45,55</sup>. Second, Ot lacks any identifiable *rvhB1* gene, which is present only in  
543 *Rickettsia* spp. This gene encodes a lytic transglycosylase predicted to cleave  
544 **peptidoglycan (PGN)** to allow T4SS scaffold assembly<sup>51</sup>. Compared with *Rickettsia* spp.,  
545 which synthesize a canonical PGN layer<sup>56,57</sup>, the presence of a minimal cell wall in Ot and  
546 Anaplasmataceae species is consistent with the absence of *rvhB1* from these genomes<sup>58,59</sup>.  
547 These collective differences in *rvh* T4SS architecture present clear convergent evolution in  
548 Ot and Anaplasmataceae species in the context of shared cell wall morphology and  
549 probable responses to host cell immune pressures<sup>60</sup>.

550

551 Our analysis shows that the identities of six *rvh* gene clusters are conserved across Ot  
552 strains, whilst the genomic positions of the clusters vary between strains (**Fig. 7D**). Clusters  
553 1 (*rvhB7*, *rvhB8-I*, *rvhB9-II*, *rvhB10*, *rvhB11*, *rvhD4*), 2 (*rvhB6e*) and 4 (*rvhB4-II*) are located  
554 within RAGEs in all strains, with the other *rvh* genes consistently located in IR regions  
555 except for cluster 6 and clusters 3 and 6 in UT176 and TA686, respectively (**Fig. 7D, F**).  
556 Analysis of published datasets of proteomics and RNAseq data in Karp and UT76<sup>19,22</sup> show  
557 that RvhB2-3 and RvhB7 proteins are not detected under growth conditions used in those  
558 analyses, although transcription levels of *rvhB2-3* are high (**Fig. 7E**). All the other Rvh  
559 proteins are detected in UT76 and most are detected in Karp. The UT76 dataset compared  
560 peptide levels in two different bacteria populations: **intracellular bacteria (IB)** and

561 **extracellular bacteria (EB)**<sup>22</sup>. The EB/IB ratio of some multi-copy Rvh proteins differs  
562 between paralogs; e.g., RvhB2-1, which is present at a ratio of 0.76 compared with the ratio  
563 of 0.19 for RvhB2-2. This suggests expression of these proteins may be differentially  
564 regulated, potentially reflecting functional differences. Our collective analyses indicate that  
565 Ot Rvh genes can form a functional P-T4SS, despite the pervasive mobile element-induced  
566 gene shuffling in Ot genomes. While no Ot *rvh* transported effector has been described to  
567 date, it is highly likely that Ot utilizes the *rvh* T4SS during host cell infection, as secreted  
568 proteins that interact with the T4SS gatekeeper, RvhD4, have been described for *R. typhi*<sup>61-</sup>  
569 <sup>63</sup>, *R. rickettsii*<sup>62,64</sup>, *A. marginale*<sup>65</sup>, *A. phagocytophilum*<sup>66-69 70-72</sup> and *Ehrlichia chaffeensis*<sup>68,73</sup>  
570 <sup>74-76</sup>.

571

## 572 **Ot lacks defence mechanisms against invasive DNA**

573 We show here that the Ot genome is exceptional in its abundance of invasive mobile genetic  
574 elements, including ICEs, transposases, group II introns and prophages. Bacteria have  
575 evolved a range of anti-viral mechanisms to minimise damage caused by mobile genetic  
576 elements<sup>77-79</sup>. We therefore sought to assess if Ot lacks these protective systems, possibly  
577 explaining the proliferation of mobile genetic elements. We used DefenseFinder to carry out  
578 a systematic search for all known anti-phage systems including restriction modification  
579 systems, CRISPr/Cas systems, and toxin-antidote defence modules<sup>78,80</sup>. We found that none  
580 of the Ot strains in our study had any identifiable defence systems. Whilst it is possible that  
581 this is due to sequence divergence, small size (e.g., certain toxin-antidote modules) or  
582 systems that have not yet been discovered, the software was able to detect three different  
583 restriction modification systems and the newly described Pyscar defence system<sup>81</sup> in the  
584 closely related free living alphaproteobacterial *Caulobacter crescentus*. In addition to lacking  
585 identifiable antiviral defence systems, Ot also has limited homologous recombination  
586 capability, a system that is frequently used in antiviral defence<sup>78</sup>. Whilst Ot encodes RecA  
587 and the alternative homologous recombination pathway RecFOR, it lacks the major repair  
588 complex RecBCD that can defend against some mobile genetic elements by degrading

589 linear double stranded DNA<sup>10</sup>. Overall, Ot lacks identifiable mobile genetic elements defence  
590 systems likely explaining the proliferation of mobile DNA in these genomes.

591

## 592 **Conclusions**

593 The identification of complete RAGEs in two Ot strains raises the possibility that these ICEs  
594 are active at the population level. Evidence for this hypothesis awaits whole genome  
595 sequencing of large numbers of Ot isolates beyond the total of eight currently available.  
596 Whilst only two genomes encode complete RAGEs with full length genes, all encode all the  
597 genes required for RAGE mobilisation, albeit in dispersed locations across the genome.  
598 Future research is needed to determine whether such mosaic RAGEs can be mobilised or  
599 not.

600 The identification of potentially active RAGEs in Ot raises the question of how they can be  
601 transferred between Ot organisms during their lifecycle. Ot is an obligate intracellular  
602 bacterium and therefore bacterial cells have limited interactions with other bacteria of the  
603 same or different species. It is possible that different strains of Ot infect the same host cell in  
604 a mite or a rodent during co-infection by two species. Albeit rare, this could occur with  
605 sufficient frequency to enable horizontal gene transfer between species. Alternatively, it is  
606 possible that the extracellular form of Ot retains sufficient residual metabolic activity to  
607 support lateral DNA transfer in the cell-free extracellular state. Mites typically feed in a tight  
608 cluster, for example on the ear of an infested rodent, and the co-feeding pool may provide  
609 the environment for close encounters between Ot cells in an intracellular or extracellular  
610 state to mediate conjugation. Finally, while not detected in other environments or hosts (i.e.  
611 protists), there could be other opportunities for Ot strains to exchange DNA or acquire DNA  
612 from other intracellular species.

613 In conclusion, this study has led to the manual re-annotation of the genomes of eight strains  
614 of Ot, enabling the delineation of RAGE and IR regions. Open questions remain. Importantly,  
615 whilst intact RAGEs have been identified in two strains, the dynamics of the Ot RAGE are

616 completely unknown. It is also unknown whether the current set of RAGEs within one  
617 genome results from one or multiple invasion events. The Ot RAGE encodes an F-T4SS, but  
618 it is not known if these are active, nor what they transport beyond the ICE itself. Progress  
619 towards answering these questions will enable further insights into the biology and  
620 pathogenicity of this important human pathogen.



## 621 **Figure Legends**

622 **Figure 1. Ot RAGE and IR elements. A.** An overview of the genomes of eight Ot strains  
623 with genes classified into RAGE and IR regions. Numbers at left refer to Ot strains listed in  
624 panel B. Grey arrows = RAGE regions; colored arrows = IR regions. The colors correspond  
625 to conserved IR regions between strains and demonstrate the lack of synteny between Ot  
626 genomes. **B.** Table summarizing RAGEs, IR regions and isolated mobile genes, cargo  
627 genes and hypothetical genes that could not be classified into RAGE or IR elements. Ot  
628 strains are listed accordingly to a previously estimated phylogeny<sup>10</sup>, with numbers  
629 corresponding to full genome maps in panel A. **C.** Organization of genes in the four  
630 complete RAGEs found in our analysis. t = truncated (at least one identifiable domain  
631 present); d = degraded (no identifiable domains present). Detailed analysis of the  
632 reannotation and classification of all genes in the eight genomes are given in  
633 **Supplementary Dataset 1.**

634

635 **Figure 2. Single and multi-copy cargo genes encoded on Ot RAGEs. A.** Single or low-  
636 copy cargo genes encoded on Ot RAGE. Summary statistics show whether genes are  
637 present in single or multiple copies on RAGEs in different strains, and also in single or  
638 multiple copies in IRs. The exact number of copies is given for each gene. Blue text =  
639 number of copies in IR; red text = number of copies in RAGE. **B.** Frequency and distribution  
640 of high copy cargo genes (both full length and truncated/degraded) within RAGEs in eight  
641 strains of Ot. Numbers in brackets denote additional copies in IRs.

642

643 **Fig. 3. Analysis of high copy cargo genes on RAGE elements in Ot. A-C.** Frequency  
644 and distribution of RAGE cargo genes annotated as **(A)** membrane proteins, **(B)** Dam DNA  
645 methyltransferases, and **(C)** DNA helicases. DnaB is a replicative DNA helicase and UvrB is  
646 a repair DNA helicase. **D.** Frequency and distribution of RAGE cargo genes encoding  
647 MRP/histidine kinases, with examples of His kinase divergent architectures. **E.** Frequency  
648 and distribution of RAGE cargo genes encoding SpoT stringent response regulators, with

649 examples of divergent architectures. The bifunctional SpoT protein is compared to the  
650 canonical SpoT protein of *E. coli*. **E.** Frequency and distribution of RAGE cargo genes  
651 encoding HPs. DnaA\_N, N-terminal domain of DnaA; RHOD, rhodanese homology domain;  
652 AHH, adenosyl homocysteine hydrolase; MagZ, nucleoside triphosphate pyrophospho-  
653 hydrolase; na/nt, nucleic acid/nucleotide deaminase; BrkB-like, YihY/virulence factor BrkB  
654 family protein; Pdu(A)C, copper chaperone; CdAMP\_rec, cyclic diAMP receptor proteins;  
655 Rvt\_1 (PF00078), reverse transcriptase Pfam PF00078; Rvt\_N 19, domain of reverse  
656 transcriptase Rvt\_N; DUF, domain of unknown function.

657

658 **Figure 4. Putative effectors piggybacking on Ot RAGE. A.** Frequency and distribution of  
659 Anks in Ot genomes. Anks are broken down into orthologous groups (OGs, present in two or  
660 more genomes) or singletons (unique to a genome). CC, coiled coil; PRANC (Pox proteins  
661 Repeats of ANkyrin, C-terminal), domain found at the C terminus of certain Pox virus  
662 proteins; F-box, motif of approximately 50 amino acids that functions in protein-protein  
663 interactions. **B.** (*top*) graphical view of Ank OG strain representation (2-8 genomes). Roughly  
664 25% of Ank OGs are found in five or more strains, with variable levels of conservation in  
665 copy number per genome. (*bottom*) Architectures for Anks present in all Ot genomes, with  
666 proteins from Ot strain Karp. **C.** Frequency and distribution of TPRs in Ot genomes. Nine  
667 ortholog groups contain all the TPR s across eight Ot genomes. **D.** Examples of diverse TPR  
668 architectures for six proteins from Ot strain Karp.

669

670 **Figure 5. A diversity of mobile genetic elements associates with Ot RAGEs. A.**  
671 Frequency and distribution of Ot RAGE-associated genes encoding integrases, Group II  
672 intron-associated reverse transcriptases, and IS elements ISOt3 and ISOt5. **B.** Frequency  
673 and distribution of IS elements in Ikeda and Karp strains. **C.** Alignment showing classification  
674 of ISOt1 elements as full length or degraded. Full length copies of ISOt1 in Karp are shown  
675 by red dotted box. **D.** Overview of prophage elements in Ot genomes as identified by

676 PHASTER search tool . Int = integrase, Tnp = transposase, Env = envelope, Cap = capsid,  
677 Pro = protease. **E.** Overview of predicted phage region in TA686.

678

679 **Figure 6. Characteristics of the F-type T4SS and relaxosome proteins encoded on Ot**

680 **RAGEs.** **A.** Composition of the Ot RAGE F-T4SS in relation to the *Agrobacterium*

681 *tumefaciens vir* P-T4SS and the *Escherichia coli tra/trb* F-T4SS from the F operon.

682 Analogues across divergent T4SSs are coloured similarly, with other colours as follows: dark

683 gray, RAGE T4SS proteins found in F-T4SSs but not P-T4SSs; white, *E. coli* F-T4SS

684 scaffold genes not present in RAGE T4SSs; light gray, other *E. coli* F operon genes not

685 present in RAGE. For relaxosome proteins (olive green), domains were predicted with

686 SMART<sup>82</sup>. **B.** Theoretical assembly of the RAGE T4SS in relation to data from other F- and

687 P-type T4SSs. The uncertain synthesis of a pilus is depicted (see text for details). **C.**

688 Comparison of the *E. coli* F operon to mobilisation genes of complete RAGEs from Ot str.

689 Gilliam and *Rickettsia bellii* str. RML369-C. This *E. coli* strain, K-12 ER3466 (CP010442),

690 has the F operon on a chromosomal segment flanked by transposases (yellow circles). Red

691 shading and numbers indicate % aa identity across pairwise alignments. Dashed lines

692 enclose the relaxosome genes, whose protein domains are described in panel A. INT,

693 integrase; LRR, leucine rich repeat protein. **D.** Frequency and distribution of of full length

694 and truncated *tra/trb* genes in Ot strains. Complete circles, genomes containing full sets of

695 *tra/trb* genes within one or more RAGE; open circles, no complete *tra/trb* gene sets.

696 Numbers in parentheses: number of complete RAGEs/number of complete RAGE genes

697 containing truncated genes/incomplete RAGEs. Details of truncated genes and gene fusions

698 are given in Supplementary Datasets 1 and 8. **E.** Genomic location of *tra/trb* gene clusters in

699 Ot str. Gilliam. Triangles and highlighting depict complete RAGEs. Bracketed TraE and

700 TraA<sub>T1</sub> are commonly occurring pseudogenized duplications. Green circles, complete gene;

701 small black circles, predicted pseudogene; Xs, gene absent with *tra/trb* gene cluster.

702

703 **Figure 7. Synopsis of Ot P-type (*vir*-like) T4SS genes. A.** Description of the general *rvh*  
704 T4SS characteristics, summarized from prior studies<sup>43,45,51,52</sup>. **B.** Theoretical assembly of the  
705 RAGE T4SS in relation to data from other P-type T4SSs. There is no synthesis of a T-pilus  
706 (see text for details) **C.** Comparison of genes encoding *vir* T4SS in *Agrobacterium*  
707 *tumefaciens*, the archetypal P-T4SS, and those encoding the *rvh* T4SS in *Rickettsia typhi*  
708 and Ot. **D.** Arrangement of *rvh* genes in Ot genomes. Red genes are located in RAGE  
709 regions whilst blue are located in IR regions. **E.** Previously published RNAseq and  
710 proteomics data showing relative expression levels of *rvh* genes in strains UT76 and Karp.  
711 These are taken from Atwal et. al 2022 (UT76) and Mika-Gospodorz et. al 2020 (Karp).  
712 UT76 data shows relative peptide counts in intracellular bacteria (IB) and extracellular  
713 bacteria (EB). Karp data shows presence or absence of detectable peptides from proteomics  
714 analysis (+/-) and relative RNA transcripts from RNAseq data (TPM/transcripts per million).  
715 **F.** Distribution of *vir* genes across Ot genomes showing lack of conservation of absolute  
716 position, despite similarities in gene groupings as shown in **Fig. 7D**.  
717  
718

719 **Methods**

720 **Table Methods 1: Accession numbers of genomes used in this study**

| Strains        | Genome accession numbers | Links                                                                                                                 |
|----------------|--------------------------|-----------------------------------------------------------------------------------------------------------------------|
| <b>Boryong</b> | AM494475.1               | <a href="https://www.ncbi.nlm.nih.gov/nucleotide/AM494475.1">https://www.ncbi.nlm.nih.gov/nucleotide/AM494475.1</a>   |
|                | NC009488.1               | <a href="https://www.ncbi.nlm.nih.gov/nucleotide/NC_009488.1">https://www.ncbi.nlm.nih.gov/nucleotide/NC_009488.1</a> |
| <b>UT76</b>    | LS398552.1               | <a href="https://www.ncbi.nlm.nih.gov/nucleotide/LS398552">https://www.ncbi.nlm.nih.gov/nucleotide/LS398552</a>       |
| <b>UT176</b>   | LS398547.1               | <a href="https://www.ncbi.nlm.nih.gov/nucleotide/LS398547.1">https://www.ncbi.nlm.nih.gov/nucleotide/LS398547.1</a>   |
| <b>Karp</b>    | LS398548.1               | <a href="https://www.ncbi.nlm.nih.gov/nucleotide/LS398548.1">https://www.ncbi.nlm.nih.gov/nucleotide/LS398548.1</a>   |
| <b>Kato</b>    | LS398550.1               | <a href="https://www.ncbi.nlm.nih.gov/nucleotide/LS398550.1">https://www.ncbi.nlm.nih.gov/nucleotide/LS398550.1</a>   |
| <b>Ikeda</b>   | AP008981.1               | <a href="https://www.ncbi.nlm.nih.gov/nucleotide/AP008981.1">https://www.ncbi.nlm.nih.gov/nucleotide/AP008981.1</a>   |
|                | NC_010793.1              | <a href="https://www.ncbi.nlm.nih.gov/nucleotide/NC_010793.1">https://www.ncbi.nlm.nih.gov/nucleotide/NC_010793.1</a> |
| <b>TA686</b>   | LS398549.1               | <a href="https://www.ncbi.nlm.nih.gov/nucleotide/LS398549.1">https://www.ncbi.nlm.nih.gov/nucleotide/LS398549.1</a>   |
| <b>Gilliam</b> | LS398551.1               | <a href="https://www.ncbi.nlm.nih.gov/nucleotide/LS398551.1">https://www.ncbi.nlm.nih.gov/nucleotide/LS398551.1</a>   |

721

722 **Identification of RAGE and inter-RAGE regions in the genome of Ot**

723 The boundaries of RAGE and IRs were manually delineated in each genome using defined  
724 criteria. First, groups of genes whose relative position to one another was conserved across  
725 strains were identified manually by comparing the genomes of 8 Ot strains (Ikeda, Boryong,  
726 Karp, Kato, Gilliam, TA686, UT76 and UT176). This led to the identification and numbering  
727 of IR regions.

728 RAGE regions were subsequently identified using criteria largely drawn from *K Nakayama et*  
729 *al*, 2008<sup>9</sup>.

730 The element was classified as a “complete RAGE gene” if the sequences encoded a  
731 full-length integrase gene at the left end (N-terminus), a full-length transposase gene, full-  
732 length set of conjugative transfer genes (tra genes: *TraA*, *TraB*, *TraC*, *TraD*, *TraE*, *TraF*,  
733 *TraG*, *TraH*, *TraI*, *TraK*, *TraL*, *TraN*, *TraU*, *TraV*, *TraW*), and nonconjugative genes (RAGE  
734 associated cargo genes) including one or all of the following: SpoT-related proteins (ppGpp

735 hydrolase, (p)ppGpp synthetase, SpoT synthase, and SpoT hydrolase), DNA  
736 methyltransferase, DNA helicase, histidine kinases, ATP-binding proteins (mrp), HNH  
737 endonuclease, membrane proteins, ankyrin repeat proteins, and hypothetical proteins. The  
738 RAGE associated cargo genes in “complete RAGE gene” can be either full-length or  
739 truncated genes.

740 The element was classified as an “complete RAGE with truncated genes” if the  
741 sequence encoded the same gene set as above, but where one or more of the integrase,  
742 transposase, or Tra conjugative transfer genes were truncated.

743 The element was classified as an “incomplete RAGE” if the sequence encoded  
744 integrase or transposases, and at least one RAGE associated cargo gene.

745 The “isolated mobile gene” was defined as encoding one or more integrase or  
746 transposases without RAGE associated cargo genes.

747 The “isolated cargo gene” was defined as encoding one or more cargo genes without  
748 transposases, integrases, or Tra genes.

749 The “isolated hypothetical protein” was defined as encoding one or more hypothetical  
750 proteins at the boundary of conserved IRs or RAGEs.

751 The presence of a *dnaA* gene was used as an indicator gene for defining the end of  
752 a RAGE element (Fig. Methods 1). However, the criteria could not be applied for all RAGE  
753 elements when hypothetical proteins and transposases are located at the end of RAGE  
754 masking the original *dnaA* terminus. In the first case (Fig. Methods 1A), RAGE elements are  
755 located next to each other in the same direction. RAGE is terminated when integrase gene  
756 of the next RAGE is found. In the second case (Fig. Methods B), RAGE elements are  
757 located next to each other in opposite direction and two *dnaA* genes are located next to the  
758 each other. In this case the RAGE is terminated at the *dnaA* gene which belongs to RAGE  
759 on the left (forward direction) and RAGE on the right (reverse direction). In the third case  
760 (Fig. Methods C), RAGE elements are located next to each other in opposite direction. Two  
761 RAGEs were combined into one RAGE if a *dnaA* gene was not present in either RAGE.

762

763

764

765

766

767

768

769

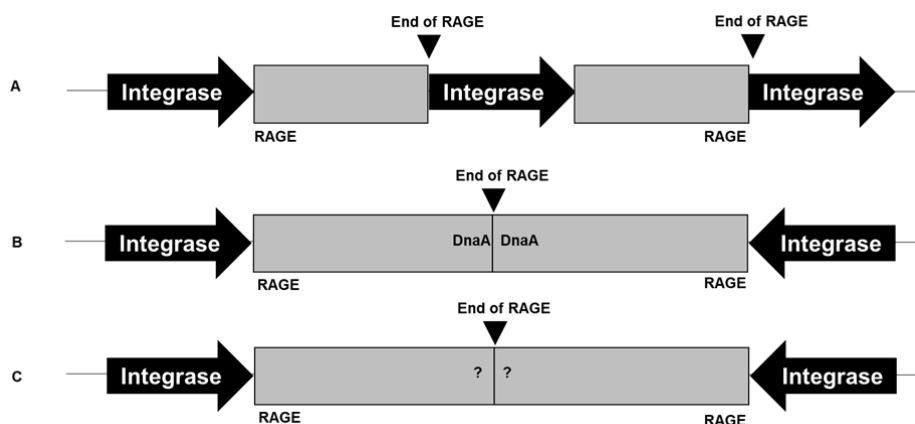

770

Figure Methods 1. Identification of RAGE termination positions.

771

## 772 Identification of RAGE associated cargo genes

773

774

775

776

777

778

779

The list of conserved nonconjugative genes or RAGE associated cargo genes were extracted based on *K Nakayama et al, 2008*<sup>9</sup>. The sequences were then inspected manually by observing the length of genes, conserved motifs/domains, and other elements such as signal peptides, transmembrane regions etc. A gene was defined as a “Full-length gene” if the sequence encoded a complete set of domains, a “Truncated gene” if the sequence encoded only a partial set of domains and a “Degraded gene” if no domain was identified on the sequence.

780

## 781 Analysis of multicopy cargo genes not associated with DNA mobilisation

782

Membrane proteins

783

784

785

786

787

788

789

Membrane proteins were manually extracted from the genome database and the SMART search engine<sup>82</sup> was used to identify membrane domains and other elements. The membrane protein was assigned as “OT\_RAGE\_membrane\_protein” if no identifiable domain was identified. The membrane protein was assigned on new name if significant domain/main domains were found such as autotransporter proteins (Sca family), vut1- Putative vitamin uptake transporter, RhaT- Permease of the drug/metabolite transporter (DMT) superfamily, and Bax inhibitor-1 (BI-1)/YccA inhibitor of FtsH protease domains.

790

791 MRP/histidine kinases

792 All genes previously annotated as histidine kinase (HK) and multidrug resistance-  
793 associated proteins (MRPs) were extracted from the genome databases and analysed using  
794 SMART<sup>82</sup>. Both HK and mrp proteins contain an HATPase\_c domain (Histidine kinase-type  
795 ATPases catalytic domain). This domain is found in several ATP-binding proteins, including:  
796 histidine kinase<sup>83</sup>, DNA gyrase B<sup>84</sup>, topoisomerases, and heat shock protein HSP90<sup>85</sup>. The  
797 new naming system of HK and mrp were classified based on the HATPase\_c domain. HK or  
798 mrp proteins were renamed as “HATPase\_c domain containing protein” if the search found  
799 an HATPase\_c domain. HK or mrp proteins were renamed as “degraded HATpase\_c” if no  
800 significant domains were found on the search. HK and mrp proteins in this study were  
801 classified as truncated gene because they only contained catalytic part (HATPase\_c) and  
802 lacked other major domains such as sensor domain, HisKA( Histidine kinase A domain  
803 dimierization/His phosphotransfer), and receiver Hpt (Histidine phosphotransfer)<sup>86</sup>.

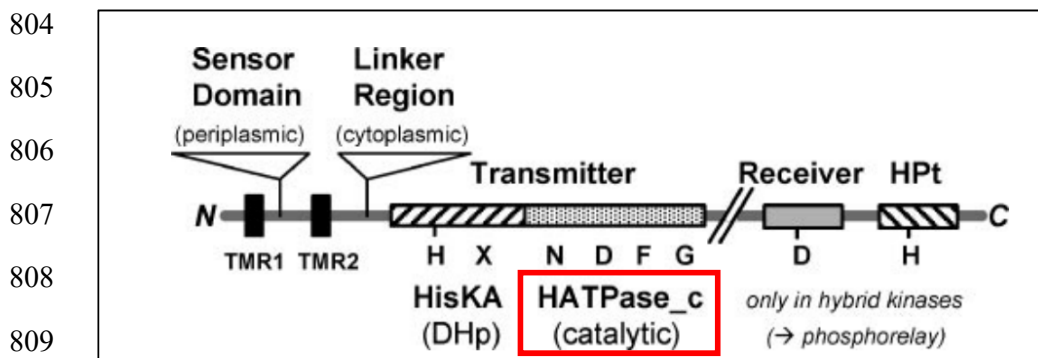

810

811 Fig. Methods 2. The overview of domain of histidine protein kinases. Figure is modified from  
812 ref<sup>86</sup>.

813

814 In addition, the same HATPase\_c domain was also found in symporter proteins. The  
815 sodium:proline symporter “PutP” was classified as full-length if the sequence contained  
816 symporter, HisKA, HATPase\_c, and REC domains. PutP was classified as “truncated  
817 PutP” or “degraded PutP” if the sequence lacked the symporter and REC domains. The



818 symporter Sodium:pantothenate symporter “PanF” was classified as full-length if the  
819 sequence contained only the symporter region.

820

821 (p)ppGpp hydroplase/synthetases

822 We manually extracted all genes annotated as: SpoT, (p)ppGpp, synthetase, and  
823 hydrolase from the genome databases. The sequences were then compared to their  
824 respective orthologs in *Escherichia coli* (ECO) and *Caulobacter crescentus* (CCS). Literature  
825 searches and GenomeNet motif search (pfam) were used to identify motifs and conserved  
826 regions in these sequences as shown (**Table Methods 2**).

827

828 **Table Methods 2.** Motifs conserved in SpoT. Underlined base(s) indicate important amino  
829 acid in the motif.

| Domains                                                                          | Conserved | Motifs                                                                                                                                                                                      | References                                         |
|----------------------------------------------------------------------------------|-----------|---------------------------------------------------------------------------------------------------------------------------------------------------------------------------------------------|----------------------------------------------------|
| HD domain (Hydrolase)                                                            | region    | AIDYAIHY <u>H</u> GXQTRESGDPYYHPLHVALIIAQMKXDTVSVITAL<br>L <u>H</u> DTVEDTELTLSDIEREFGEVAXLV DGVTKLXKLRFSYHXQQ<br>AXNFRKLLLAISNDIRVLLVKLADRLH <u>N</u> MRTIESIKLLNKRIIRIAE<br>TXEYAPLAERIGA | Gemma C Atkinson et al., 2011                      |
|                                                                                  | H1        | <u>H</u> XXXXR/KXXG/QXXYXXXP/Q/WXX                                                                                                                                                          | Justyna M Prusinska et al., 2019                   |
|                                                                                  | H2        | I/VT/IAXL <u>H</u> D/N                                                                                                                                                                      | Justyna M Prusinska et al., 2019                   |
|                                                                                  | H3        | XLLXKLXXRXH <u>N</u> XXXX                                                                                                                                                                   | Justyna M Prusinska et al., 2019                   |
| SYNTH domain (Synthetase)                                                        | region    | <u>G</u> /ARXXXXYSIXXXMXXKIXXXQLDXAXRXIXXXXXXXXXXXC<br>YXXLXXIHXXYXXXPXXXQDFIXXPXNGY <u>Q</u> SXHTXIXGPXXXXI<br>EVQIRTXXMHXXXXXGAAHWXYK                                                     | Gemma C Atkinson et al., 2011                      |
|                                                                                  | G         | <u>G</u> RHK                                                                                                                                                                                | Justyna M Prusinska et al., 2019                   |
|                                                                                  | YQS       | NGY <u>Q</u> SXHT                                                                                                                                                                           | Fabio Lino Gratani et al., 2018                    |
| TGS domain (Thr-tRNA synthetase, GTPase and SpoT domain)                         | region    | CFTPXGKLIALPKGATVVDFAKXKXSELGNKCIKAKISNKVVPLD<br>TQLQNGDQVEIIT                                                                                                                              | Gemma C Atkinson et al., 2011                      |
|                                                                                  | H         | DFAYXX <u>H</u> XXXG                                                                                                                                                                        | Winter et al., 2018                                |
| Helical domain                                                                   | region    | TFAVTGKAQSEIRKFIKQAYKYYIDLGKEILIQTLKKIQVANINV<br>CIAKIAHXLNKKNVVEVFFXIGXELLSKKEIKIIT                                                                                                        | GenomeNet motif search (pfam)                      |
| CC domain (Conserve cysteine/RIS-Ribosome InterSubunit domain)                   | CC        | <u>C</u> CYPLPGDLIIGLCT                                                                                                                                                                     | Jain V et al., 2007; Gemma C Atkinson et al., 2011 |
| ACT domain (Aspartokinase, Chorismate mutase and TyrA/RRM-RNA Recognition motif) | region    | RNKIGSLASITILENNXNICNIKTNTXSTQSTXQIIDIESTLEQL<br>NKIXNILQSSXDIISVXR                                                                                                                         | Gemma C Atkinson et al., 2011                      |

830  
831

832 We employed a naming system based on the presence of domains/motifs in each  
833 CDS. genes containing all domains (HD, SYNTH, TGS, Helical, CC, ACT) were annotated  
834 as SpoT. Genes having only the HD domain were annotated as SpoT-hydrolase, genes  
835 encoding only SYNTH domain was annotated as SpoT-synthetase. Genes encoding the HD

836 domain but lacking one or more of the conserved histidines was annotated as truncated  
837 hydrolase. Short fragments that could be aligned to Hydrolase but lack complete domains  
838 were annotated as degraded hydrolase. Genes containing HD domain merging with a part of  
839 HATPase were named as HATPase-SpoT-hydrolase and genes containing HD domain  
840 merging with a part of Mrp were named as Mrp-Hydrolase, respectively.

841

842 DNA methyltransferases

843 DNA methyltransferase (MTase) genes were extracted from the genome and  
844 analysed on SMART<sup>82</sup> for protein domain annotation. However, SMART does not provide  
845 the details of MTase motifs within the predicted domain. Therefore, multiple sequence  
846 alignment of DNA methyltransferase was further characterized for identification motifs using  
847 Geneious. We used the conserved amino acid residues in the Dam (DNA adenine  
848 methyltransferase) protein of *E. coli* (acc.no. P0AEE9) as a reference for identification motifs  
849 I-VII & motif X of MTase at C-terminal region<sup>87</sup>. The protein sequence of DNA  
850 methyltransferase containing motif I-VII & motif X was indicated as full-length gene. The  
851 protein sequence of DNA methyltransferase with incomplete motifs and unidentified motifs  
852 were indicated as truncated gene, and degraded gene, respectively.

853

854 Replicative DNA helicases

855 DNA helicase genes were filtered from the genome and their protein domains were  
856 characterized by SMART<sup>82</sup>. Multiple sequence alignments of the helicase genes was then  
857 carried out in order to identify motifs. We used the conserved amino acid residues in the  
858 DnaB protein of *E. coli* K12 (acc.no. NC000913.3) as a reference for the identification of  
859 motifs I-VII at C-terminal region<sup>88</sup>. The protein sequence of DnaB containing motif I-VII was  
860 indicated as full-length gene. The protein sequence of DnaB with incomplete motif and  
861 unidentified motifs was indicated as truncated gene and degraded gene, respectively.

862

863 Uncharacterised proteins

864           Between 308-464 genes annotated as hypothetical or uncharacterised were found in  
865 the eight genomes of *Orientia*. In this study, we only manually analysed uncharacterised  
866 proteins from Karp strain as a model to minimize the analysis time. Uncharacterised proteins  
867 from Karp were filtered from the genome and the protein domain was characterized by  
868 SMART<sup>82</sup>. Where clear groups of homologous genes within the set of Karp genes was  
869 found, these were classified into 25 defined groups. These were renamed according to  
870 known domains with which they had homology, or named Ot\_RAGE\_hypo\_group 1-7. These  
871 25 groups were then aligned to the other seven genomes in our dataset in order to  
872 determine the conservation of the groups of genes.

873           Some uncharacterised proteins were changed to new name, and no longer classified  
874 as hypothetical proteins, if they aligned to known genes such as DnaA, Phage portal protein,  
875 Lipase3 etc.

876

### 877 **Analysis of multicopy genes involved in DNA mobilisation**

878 Insertion sequence transposable elements

879 The presence of insertion sequence (IS) elements in Ot was investigated using the online  
880 search tool ISfinder<sup>89</sup> to match with attributes and nomenclatures previously submitted for  
881 *Orientia*-specific IS<sup>9</sup>. Each IS match was manually traced for completeness with flanking  
882 inverted repeats (IR) and direct repeats (DR) along respective genome sequences.  
883 Extensive analysis was performed with Karp strain to identify the complete set of IS  
884 elements and classified into classes. Only ISOt3 and ISOt5 were systematically analysed  
885 across all 8 different *Orientia* genomes.

886

887 Integrases

888 Genes annotated as integrase genes were extracted from the genomes and protein domains  
889 were screened by SMART<sup>82</sup>. Integrase in *Orientia* is a phage integrase which is classified  
890 into two major families: the tyrosine recombinases and the serine recombinases, based on  
891 mode of catalysis<sup>90</sup>. Then multiple sequence alignment of phage integrase domain was

892 analysed for identification motifs using Geneious. We used the conserved amino acid  
893 residues in Bacteriophage P2-integrase (acc.no. AF063097.1) and Enterobacteria phage  
894 P2-integrase (acc.no. NC\_009488.1) as references for the identification of three domains;  
895 arm-type binding motifs at N-terminal region, core-type binding (CB), and catalysis at C-  
896 terminal region. The His-X-X-Arg motifs and second conserved Arginine on catalytic domain  
897 were also included in the alignment<sup>90,91</sup>. The protein sequence of phage integrase containing  
898 arm-type binding, core-type binding, and catalysis motifs was indicated as full-length gene.  
899 The protein sequence of phage integrase with incomplete motif and unidentified motif was  
900 annotated as truncated gene and degraded gene, respectively.

901

#### 902 Reverse transcriptases

903 Reverse transcriptase (*rvt*) genes were filtered from the genome and protein domains were  
904 characterized by SMART<sup>82</sup>. Multiple sequence alignment of *rvt* was then analysed for  
905 identification motifs. We used the conserved amino acid residues of group II intron reverse  
906 transcriptase/maturase (LtrA) in *E. coli* (acc.no. WP\_096836589.1), and *Lactococcus lactis*  
907 (acc.no. NZ\_CP059048.1) as a reference for the identification of three domains; reverse  
908 transcriptases (RVT\_N) at N-terminal site, reverse transcriptases (RT), and Group II intron,  
909 maturase-specific domain (GIIM) at C-terminal site<sup>92-94</sup>. The protein sequence of reverse  
910 transcriptase containing RVT\_N, RT, and GIIM was indicated as full-length gene. The  
911 protein sequence of reverse transcriptase with incomplete motif and unidentified motif was  
912 indicated as truncated gene and degraded gene, respectively.

913

#### 914 Transposases

915 Genes annotated as transposase genes were first extracted from the genome. Then, protein  
916 domains and motifs were further characterized by SMART<sup>82</sup> and Geneious, respectively.  
917 Transposase gene in *Orientia* belong to restriction endonuclease-like proteins or PD-  
918 (D/E)XK nucleases and DD[E/D]- transposase, which generally contain the catalytic domain,  
919 and transposon-binding domain<sup>95,96</sup>. Some transposases additionally contain C-terminal or

920 N-terminal domains<sup>97</sup>. In this study, we used the conserved amino acid residues of in *E. coli*  
921 (acc.no. NC 002695.2) as a reference for identification restriction endonuclease-like motifs  
922 (I-IV). Three conserved active sites in motif II and III, one of which is aspartic acid (D), one is  
923 either glutamic (E) or aspartic acid (D) and/or the last one is lysine (K), were identified for  
924 characterization of PD-(D/E)XK nucleases and DD[E/D]- transposase motifs<sup>95,96</sup>. The protein  
925 sequence of transposase containing motifs (I-IV) and PD-(D/E)XK signature residues was  
926 indicated as full-length gene. The protein sequence of transposase with incomplete motif  
927 and unidentified motif was indicated as truncated gene and degraded gene, respectively.

928

929 Prophage genes

930 Potential prophage sequences within 8 *Orientia* genomes were identified using PHASTER  
931 (PHAge Search Tool Enhanced Released)<sup>41</sup> where specific phage related proteins such as  
932 'coat', 'fiber', 'head', 'plate', 'tail', 'integrase', 'terminase', 'transposase', 'portal', 'protease' or  
933 'lysin' within bacterial genomes were recognized using a sequence identity search.

934

### 935 **Analysis of Ankyrin repeat containing proteins**

936 To identify Ankyrin repeat (AR) proteins (Anks) from previously annotated records, all Ank  
937 sequences were extracted and analyzed using SMART<sup>82</sup> to predict ARs and other domains  
938 including coiled-coil, F-box, and PRANC. SMART<sup>82</sup> defines an Ank as a 33-residue motif.  
939 Ank commonly involves in protein-protein interaction. The core of the repeat seems to be a  
940 helix-loop-helix structure. SMART's consensus for an ankyrin repeat is shown in Fig.  
941 Methods 3. It is important to note that the protein structure or functionality of any Ank was  
942 not characterized in this study. Therefore, any Ank that contains only one or two repeats  
943 may be non-functional.

944

945

946

947

948

949

```
004242/1-30      NGHTALHIAASK-----GDEQCVKLLLEHGA-----DPNA
CONSENSUS/80%   .t.sslhhsh.t.....tp.phhphllp.t.....pht.
CONSENSUS/65%   pstosLphAstp.....sphphlphLlptss.....shsh
CONSENSUS/50%   sGpTsLHhAsps.....sshcllchLlspus.....slst
```

950

951

952

| Class       | Key | Residues                                |
|-------------|-----|-----------------------------------------|
| alcohol     | o   | S,T                                     |
| aliphatic   | l   | I,L,V                                   |
| any         | .   | A,C,D,E,F,G,H,I,K,L,M,N,P,Q,R,S,T,V,W,Y |
| aromatic    | a   | F,H,W,Y                                 |
| charged     | c   | D,E,H,K,R                               |
| hydrophobic | h   | A,C,F,G,H,I,K,L,M,R,T,V,W,Y             |
| negative    | -   | D,E                                     |
| polar       | p   | C,D,E,H,K,N,Q,R,S,T                     |
| positive    | +   | H,K,R                                   |
| small       | s   | A,C,D,G,N,P,S,T,V                       |
| tiny        | u   | A,G,S                                   |
| turnlike    | t   | A,C,D,E,G,H,K,N,Q,R,S,T                 |

953

954

955

956

957

958

959

Fig .Methods 3 Consensus term for Ank domain by SMART.

960

961

Identification of homologous Ank repeats across Ot strains were manually inspected using Geneious. The criteria for identification of a homolog Ank is based on sequence similarity and repeated units. Individual Ank sequences of the other 7 strains were blasted against Ot strain Ikeda. Then, the sequence that presented the highest identity (>80-90%) was chosen to verify the similarity of Ankyrin repeats and other domains. The sequences were given the name based on the published Ikeda Anks if the overall sequence's identity to Ikeda Anks was more than 80% and presented a similar set of ARs. The sequences were given a new name if the overall sequence identity to Ikeda Anks was less than 80% and presented a different set of ARs, this included extra repeated units or missing repeated units.

970

Unidentified Anks or hypothetical proteins were manually searched and inspected using Geneious. To search unidentified Anks in Ikeda and other 7 strains, each repeat unit of an individual published Ikeda Anks were imported into "Find motifs" tool, and the maximum mismatches were set up to 10. The closely matched sequences were further identified the repeated units and other domains by SMART. Then, the sequences of unidentified Ank were blasted against the published Anks or blasted within the strain to

975

976 check whether it was different from identified Anks or not. The newly identified Anks were  
977 given a name by continued ranking after the published Ikeda Anks, starting with Ank21,  
978 Ank22, Ank23, etc.

979

### 980 **Analysis of Tetratricopeptide repeat containing proteins**

981 To identify TPR proteins from the previous annotated records of *Orientia* 8 strains, all TPR  
982 sequences were extracted and analyzed using SMART<sup>82</sup>. The program predicted the  
983 location of TPR motifs and other domains including signal peptide and transmembrane  
984 region. All identified TPR proteins were grouped based on the similarity of the location of  
985 TPR motifs. Each group consists of one long gene, the master gene, and multiple shorter  
986 duplication remnants. For unidentified TPR were manually searched using Geneious. All  
987 TPR proteins were renamed based on the group number followed the number of TPR  
988 repeats.

989

### 990 **Analysis of P-type IV secretion systems (*rvh*)**

991 Literature search and blast search (NCBI and KEGG) were performed to identify the  
992 presence of each Rvh subunit (RvhB1 to VirB11 and RvhD4) in *Ot*. The amino acid  
993 sequences of each Vir subunit present in *Ot* Boryong strain (OTS) were compared to their  
994 respective orthologs in *Rickettsia bellii* (RBE) and *Agrobacterium tumefaciens* (ATU) for their  
995 percent of amino acids identity, length of amino acid sequences, and presence of motifs.

996 The presence of motifs was used as the major criteria to identify Vir subunits as  
997 indicated in Table Methods 3:

998

999 **Table Methods 3.** Vir proteins and their motifs. Underlined base(s) indicate important amino  
1000 acid in the motif. Red letter indicates variability in amino acid sequence.

| Subunits | Motifs                                                                             | References                                                               |
|----------|------------------------------------------------------------------------------------|--------------------------------------------------------------------------|
| VirB2-1  | TM region 1 (GXXXXXXXXXXXXXXXXXXXXXIXXXG), TM region<br>2 (AI <u>VI</u> VXXXA/SXX) | Krogh Anders et al.,<br>2001, Lai Erh-Min and<br>Clarence I. Kado, 2000, |
| VirB2-2  | TM region 1 (GXXXXXXXXXXXXXXXXXXXXXIXXXG), TM region                               |                                                                          |

|         |                                                                                                                                                                                            |                                                                                           |
|---------|--------------------------------------------------------------------------------------------------------------------------------------------------------------------------------------------|-------------------------------------------------------------------------------------------|
|         | 2 (AI/V/IXXA/SXX)                                                                                                                                                                          | Gillespie Joseph J et al., 2009                                                           |
| VirB2-3 | TM region 1 (GXXXXXXXXXXXXXXXXIXXXG), TM region 2 (AI/V/IXXSXX)                                                                                                                            |                                                                                           |
| VirB3   | L-TRP-GV motif (LXXXXTRPXXXXGV)                                                                                                                                                            | Cao TB and Saier MH 2001, Gillespie Joseph J et al., 2009                                 |
| VirB4-1 | Walker A (GPXGXGKT), Motif C (FDKDRGXE), Walker B (RXXXXDGXXXXXXXXDE), Motif D (LXXXRKXN), Motif E (IXATQ)                                                                                 | Gillespie Joseph J et al., 2009, Gillespie Joseph J et al., 2016                          |
| VirB4-2 | Walker A (GXXXXGK/R), Walker B (SLXXXXXXXXIXXD)                                                                                                                                            |                                                                                           |
| VirB6-1 | Variable TM region (VXAFXXLYXXXXGXXILLX), Conserved cytoplasmic loop (PXXXXXXXXFXTXXXXXXW)                                                                                                 | Judd Paul K et al., 2005, Lawley TD et al., 2003, Gillespie Joseph J et al., 2016         |
| VirB6-2 | Variable TM region (XXAALXYXXFFXXXXXXXX), Conserved cytoplasmic loop (PXXXXXXXXFXTXXXXXXW)                                                                                                 |                                                                                           |
| VirB6-3 | Variable TM region (IXAXLXYMXXGXXFXLG), Conserved cytoplasmic loop (PXXXXXXXXFXTXXXXXXW)                                                                                                   |                                                                                           |
| VirB6-4 | Variable TM region (XXXXXXLYXTXXGXXFXLG), Conserved cytoplasmic loop (PXXXXXXXXFXT/IXXXXXXXW)                                                                                              |                                                                                           |
| VirB6-5 | Variable TM region (VXXXLXLXXXFXGXXFLIG), Conserved cytoplasmic loop (PXXXXXXXXFXTXXXXXXW)                                                                                                 |                                                                                           |
| VirB7   | Conserved cys between position 15-35; Possibility of being a small lipoprotein                                                                                                             | Gillespie Joseph J et al., 2010                                                           |
| VirB8-1 | Homodimerization domain I (YXXREXY), VirB4 interaction region (XXXYK)                                                                                                                      | Bailey Susan et al., 2006, Terradot Laurent et al., 2005, Gillespie Joseph J et al., 2009 |
| VirB8-2 | Homodimerization domain I (YXXREXY), NPxG motif (NPxG), VirB4 interaction region (XXXYR)                                                                                                   |                                                                                           |
| VirB9-1 | DXR-YXP motif (DXRXXXXXYXP), Beta 1 (NXXYXX), Beta 2-3 - OM extrusion region (PXXXXDXXXXTXXXF - PXXXXG/DDXXE), VirB7 interaction region (RXGXXXXCXXN)                                      | Gillespie Joseph J et al., 2009                                                           |
| VirB9-2 | DXR-YXP motif (DXRXXXXXYXP)                                                                                                                                                                |                                                                                           |
| VirB10  | OM pore gating (DXLGXXGXXGV), Beta 6a (VLXSAX), Beta 7a (XTXXXNQG)                                                                                                                         | Banta Lois M et al., 2011, Gillespie Joseph J et al., 2016                                |
| VirB11  | Linker A (IRXSXXXXXL), Beta 1 (XXEXXNXPG), Beta 5 (LPXXXXRXQXXPP), ATPase region/Beta 7 - Alpha E (GXTXXXKTT), Beta 8 (ERXIXED), Alpha F - Beta 10 (LXXXXLRXPDRIXXE), Beta 11 (GHPGSIXTXH) | Jorge Ripoll-Rozada & Ignacio Arechaga, 2013                                              |
| VirD4   | DNA binding motif A (APTXXGKGXGVIPXXXXXXXXSVXXDXK), DNA binding motif B (XFLLEFXXLGKXXX)                                                                                                   | L. Leloup et al, 2002, Renu B. Kumar and Anath Das, 2002                                  |



1002 VirB1 and VirB5 could not be identified in *Ot*. However, VirB7 was annotated based  
 1003 on gene positioning, conserved cysteine(s), and its important role of being a small  
 1004 lipoprotein in T4SS of *Rickettsia* species.

1005 These *rvh* genes identified in Boryong were then set as a reference strain for *Ot*.  
 1006 Each *vir* gene was then blasted (nucleotide blast using Geneious Prime) to identify the  
 1007 presence of each *rvh* across the eight strains of *Ot* (Boryong, Ikeda, Karp, Kato, Gilliam,  
 1008 TA686, UT76, UT176). The amino acid sequences of each Rvh subunit from the eight  
 1009 strains of *Ot* were then aligned (Multiple alignment - Clustal Omega) to verify their motifs.  
 1010 Even though some of the gene copies appear to be a truncation or pseudogene due to loss  
 1011 of some motif(s) like that in RvhB4-II, RvhB8-II, and RvhB9-II, they are well characterized in  
 1012 literature. So, these names were kept the same in our annotation.

1013

#### 1014 **Analysis of F-type IV secretion systems (RAGE T4SS)**

1015 Literature search and blast search (NCBI and KEGG) were performed to identify the  
 1016 presence of each Tra subunit (F-type T4SS: TraA to TraN, TraU to TraW, TrbC, TrbE and P-  
 1017 type T4SS: TraA<sub>Ti</sub>, TraD<sub>Ti</sub>,) in *Ot*. The amino acid sequences of each Tra subunit present in  
 1018 *Ot* Ikeda strain (OTT) were then compared to their respective orthologs in *Rickettsia bellii*  
 1019 (RBE) and *Escherichia coli* (ECZ) for F-type T4SS or *Agrobacterium tumefaciens* (ATU) for  
 1020 P-type T4SS. The presence of motifs was used as the major criteria to identify Tra subunits  
 1021 as indicated in Table Methods 4:

1022

1023 **Table Methods 4.** Motifs conserved in Tra and Trb proteins. Underlined base(s) indicate  
 1024 important amino acid in the motif. **Red** letter indicates variability in amino acid sequence.

| Subunits | Motifs                                                                                                                                                                                                                                                | References                                                                                   |
|----------|-------------------------------------------------------------------------------------------------------------------------------------------------------------------------------------------------------------------------------------------------------|----------------------------------------------------------------------------------------------|
| TraE     | Anchor region ( <u>LVKY</u> NKXLLXXTXXL/IAXXXX), Predicted conserved region-1 (SXXXXXXXXYLXXXXA), Predicted conserved region-2 (KXXXXXSFFXXXXXV), Predicted conserved region-3 (VXIXGXXXXWXXXXKXXXXXK/RXYLXXX) - GenomeNet Motif search (TraE region) | Frost Laura S et al., 1994, Kelley Lawrence A et al., 2015, Bragagnolo Nicholas et al., 2020 |

|      |                                                                                                                                                                                                                                                                                                                                                                                                                                         |                                                                                           |
|------|-----------------------------------------------------------------------------------------------------------------------------------------------------------------------------------------------------------------------------------------------------------------------------------------------------------------------------------------------------------------------------------------------------------------------------------------|-------------------------------------------------------------------------------------------|
| TraB | Coiled-coil domain (IXXXXQ/KXXXXL/FXXXXKXXX), Predicted conserved region (GXXSSERAXR) - GenomeNet Motif search (Trbl-like region), OM pore gating (GXXGXXGXV), Alpha-3 (GXXGXXXA/VXXXLXDXIKR/QAXXXP)                                                                                                                                                                                                                                    | Gilmour Matthew W, Banta Lois M et al., 2011, Gillespie Joseph J et al., 2016             |
| TraV | Conserved cysteine region (CXXXXXXXXXXF/L/VXCXXXXXXXXC), Predicted conserved region (LXXLF/LXXXXXG/CE) - <b>GenomeNet Motif search (TraV region)</b>                                                                                                                                                                                                                                                                                    | Harris R L et al., 2001, Harris R L et al., 2002                                          |
| TraC | Predicted conserved region-1 (YXXYXXE/KXXLFXNXXXXGFXLXXXP), Predicted conserved region-2 (YXXLXXQXXXXFXLXXXXD) - GenomeNet Motif search (TraC region), Walker A (GXXGXGKX), Motif C (V/AXDXGXXXK), Walker B (RXXXXLXXIDEXW), Motif D-E (RXXGXXXXXTQ)                                                                                                                                                                                    | Lawley T D et al., 2003, Gillespie Joseph J et al., 2009, Gillespie Joseph J et al., 2016 |
| TraW | TrbC interaction region (EXXXLVIMXXLXXXXXGXXXXXXXXF), Predicted conserved region-1 (NP/SLXXXXXXXXLXXIXGDDXXQVXWXX), Predicted conserved region-2 (FDQXXLXXXXIXXXPA) - InterPro Motif search (TraW region)                                                                                                                                                                                                                               | Shala-Lawrence Agnesa et al., 2018                                                        |
| TraU | Signaling domain (AXXCXG), Hydrophobic-2 (CMVXLG/W), Hydrophobic-3 (YWLIXX), Hydrophobic-4 (FXNXXAXXACXAD), Hydrophilic-1 (KXXRXQM), Hydrophilic-2 (W/LRKRXC/Y)                                                                                                                                                                                                                                                                         | Moore Deanna et al., 1990, Frost Laura S et al., 1994                                     |
| TrbC | Signaling domain (MXIRVMXLXLLVNN), Predicted conserved region-1 (FVSFSXXXXLXK), Predicted conserved region-2 (GXXXXXRG/RXXNXXXXT) - GenomeNet Motif search (TrbC region), TraW interaction region (IDP/SXLFXXYXXXXV/P/LXXVX)                                                                                                                                                                                                            | Maneewannakul S et al., 1991, Shala-Lawrence Agnesa et al., 2018                          |
| TraN | Conserved cysteine region-1 (SCXEGXX), Conserved cysteine region-2 (SXCXXE), Conserved cysteine region-3 (IGXXC), Conserved cysteine region-4-5 (CXXKXXYCXXFK/RLAXXXQ/H), Conserved cysteine region-6 (CRG/DXTVXE/KLQXXXF), Predicted conserved region-1 (ECXE), Predicted conserved region-2 (CXLXXXXC), Predicted conserved region-3 (CLXXXXYXC), Predicted conserved region-4 (CXKXXXXXN/HCC) - GenomeNet Motif search (TraN region) | Klimke William A et al, 2005                                                              |
| TraF | Predicted conserved region (G/XXXWYNX) - GenomeNet motif search (TraF region), C-X-X-C motif (CXXC), Beta 10 (VPXXXL/SX), Alpha 7 (ISXD/N/EXXXXXL)                                                                                                                                                                                                                                                                                      | Elton Trevor C et al., 2005                                                               |
| TraH | Trbl interaction region-1 (TXXGXXQXQ/LAAGYYXXGXLXXRT), Trbl interaction region-2 (NIXXXAX), Predicted conserved region-1 (CXXIXYLXSFSXIXG/V/REXL), Predicted conserved region-2 (FLSSIGXXXXXXXXXXXXISG), Predicted conserved region-3 (LXQXXEXXXXXR) - GenomeNet motif search (TraH)                                                                                                                                                    | Aruthyunov Denis et al., 2010, Lawley T D et al., 2003                                    |
| TraG | Membrane spanning region-1 (M/WXWXXXXXIXXXLXXX), Membrane spanning region-2 (QSVXXXL/VXXXXXXXXVPMXXLXXXXIXKXWIXXIIVVXSWPVXF), Membrane spanning region-3 (XXA/ST/MXXXLAXXPXLSWVXK/NXXXXXXXXLXXXFSXXV), Cleavage site (ASXXGX), Predicted conserved region-1 (SXXXXLSXXL), Predicted                                                                                                                                                     | Firth Neville and Ron Skurray, 1992, Audette Gerald F et al., 2006                        |

|                    |                                                                                                                                                                                                                                                                                                                                                                                                                      |                                                          |
|--------------------|----------------------------------------------------------------------------------------------------------------------------------------------------------------------------------------------------------------------------------------------------------------------------------------------------------------------------------------------------------------------------------------------------------------------|----------------------------------------------------------|
|                    | conserved region-2 (KQXXEQXXXXXXXXXXQXS) - GenomeNet motif search (TraG N-terminal region)                                                                                                                                                                                                                                                                                                                           |                                                          |
| TraD               | Transmembrane region-1 (MXXQXXXNXXXIGLXXXXXWXXXXXYQ), Transmembrane region-2 (FLXXSXXXEXXXFXIX), Walker A (GTXGXGKXX), Walker B (XXWFXDXDELP)                                                                                                                                                                                                                                                                        | Frost Laura S et al., 1994, Lessl Monika et al., 1992    |
| Tral               | Helicase region-5 (XHGAXTXXXXQ/KXAXXXXXXVXXXXXXXXXX), Predicted conserved region-1 (IXEGEXXXXXLXXXXIXGXIIXXXXI/VXXXXNXXP/LXXG/S), Predicted conserved region-2 (AVXNVXXXXAXXVXE/DXKXXXXXXXXKXXFNXLKXXGL) - GenomeNet motif search (Toprim region)                                                                                                                                                                    | Farrand Stephen K et al., 1996                           |
| TraA <sub>Ti</sub> | Nickase region-1 (AIXFXXXXXXXXRS/IXGXXSCXK/NXXYXXXXXXXXXXXXXXXXXXXXXXXXXXVXH), Nickase region-2 (NEVER/QXXXXXXNSXXXXXIVIA/VLP/Q), Nickase region-3 (NXHXH/NXXXXXRXXXXXG), Helicase region-1 (XXGXAGXGKXXXXXXA/V), Helicase region-2 (XXV/IXDE/KAGMV/A), Helicase region-3 (XXXXXLXGDXXQL/RXXXEXGXXFXXXXXXXXXXXXL), Helicase region-5 (XHGAXTXXKXQ/HGAXXXXXXV/ILXXXXXXXXXX), Helicase region-6 (YV/TXMT/IRH/YXXXXXLY) | Farrand Stephen K et al., 1996, Alt-Morbe J et al., 1996 |
| TraD <sub>Ti</sub> | Predicted conserved region-1 (RKXXXR/QXXXXXG/AXXV/LXXAXL), Predicted conserved region-2 (IGXXXFXXXXXN) - GenomeNet motif search (TraD region)                                                                                                                                                                                                                                                                        | Farrand Stephen K et al., 1996                           |

1025

1026

Note that TraA<sub>Ti</sub> found in *Rickettsia* is fragmented into TraA<sub>Ti</sub> and Tral in *Ot*. The

1027

longest *tra* and *trb* genes identified in Ikeda were set as references and were then blasted

1028

(nucleotide blast using Geneious Prime) to identify their presence across the 8 strains of *Ot*

1029

(Boryong, Ikeda, Karp, Kato, Gilliam, TA686, UT76, UT176). The amino acid sequences of

1030

each Tra subunit from the 8 strains of *Ot* were then aligned (Multiple alignment - Clustal

1031

Omega) to verify their motifs. Those amino acid sequences with difference greater than 10%

1032

from full length gene in Ikeda or missing motif(s) are considered pseudogene (truncation).

1033

1034 **Conflict of Interest**

1035 The authors declare no conflict of interest.

1036

1037 **Data Availability**

1038 All data generated by this work is available within the manuscript and supporting information.

1039

1040 **Author Contributions**

1041 Project design and supervision (JS); data analysis and figure preparation (SG, CK, JW, HA,

1042 JS, JJG); original manuscript writing (JS); manuscript revisions (SG, CK, JW, JJG, JS).

1043

1044 **Acknowledgements and Funding**

1045 We thank all the members of the lab in Cambridge and Bangkok for discussions and

1046 support. We are also grateful to Liz Batty and Nick Day in MORU for discussions,

1047 encouragement, and support. This work was funded by a Royal Society Dorothy Hodgkin

1048 Fellowship DH140154 (JS); Swiss National Science Foundation IZSTZ0\_193925 (JS, CK);

1049 Wellcome Trust Senior Research Fellowship 224277/Z/21/Z (JS), grants from the National

1050 Institutes of Health, USA, R21 AI156762 and R21 AI166832 (JJG) and American Heart

1051 Association grant 20PRE35210610 (HA).

1052

1053

1054

1055

1056 **References**

1057

- 1058 1 Giannotti, D., Boscaro, V., Husnik, F., Vannini, C. & Keeling, P. J. The "Other"  
1059 Rickettsiales: an Overview of the Family "Candidatus Midichloriaceae". *Appl Environ*  
1060 *Microbiol* **88**, e0243221, doi:10.1128/aem.02432-21 (2022).
- 1061 2 Salje, J. Cells within cells: Rickettsiales and the obligate intracellular bacterial  
1062 lifestyle. *Nat Rev Microbiol*, doi:10.1038/s41579-020-00507-2 (2021).
- 1063 3 Schon, M. E., Martijn, J., Vosseberg, J., Kostlbacher, S. & Ettema, T. J. G. The  
1064 evolutionary origin of host association in the Rickettsiales. *Nat Microbiol* **7**, 1189-  
1065 1199, doi:10.1038/s41564-022-01169-x (2022).
- 1066 4 Castelli, M. *et al.* Deianiraea, an extracellular bacterium associated with the ciliate  
1067 Paramecium, suggests an alternative scenario for the evolution of Rickettsiales. *ISME*  
1068 *J* **13**, 2280-2294, doi:10.1038/s41396-019-0433-9 (2019).
- 1069 5 Ettema, T. The evolutionary origin of host association in an ancient bacterial clade.  
1070 doi:10.7554/eLife.19469.001 (2022).
- 1071 6 Weitzel, T. *et al.* Endemic Scrub Typhus in South America. *N Engl J Med* **375**, 954-  
1072 961, doi:10.1056/NEJMoa1603657 (2016).
- 1073 7 Izzard, L. *et al.* Isolation of a novel *Orientia* species (*O. chuto* sp. nov.) from a patient  
1074 infected in Dubai. *J Clin Microbiol* **48**, 4404-4409, doi:10.1128/JCM.01526-10 (2010).
- 1075 8 Cho, N. H. *et al.* The *Orientia tsutsugamushi* genome reveals massive proliferation of  
1076 conjugative type IV secretion system and host-cell interaction genes. *Proc Natl Acad*  
1077 *Sci U S A* **104**, 7981-7986, doi:10.1073/pnas.0611553104 (2007).
- 1078 9 Nakayama, K. *et al.* The Whole-genome sequencing of the obligate intracellular  
1079 bacterium *Orientia tsutsugamushi* revealed massive gene amplification during  
1080 reductive genome evolution. *DNA Res* **15**, 185-199, doi:10.1093/dnares/dsn011  
1081 (2008).
- 1082 10 Batty EM, C. S., Blacksell SB, Richards A, Paris D, Bowden R, Chan C, Lachumanan R,  
1083 Day N, Donnelly P, Chen SL, Salje J. Long-read whole genome sequencing and  
1084 comparative analysis of six strains of the human pathogen *Orientia tsutsugamushi*.  
1085 *Plos Negl Trop Dis* (2018).
- 1086 11 Gillespie, J. *et al.* A *Rickettsia* genome overrun by mobile genetic elements provides  
1087 insight into the acquisition of genes characteristic of an obligate intracellular  
1088 lifestyle. *J Bacteriol* **194**, 376-394, doi:10.1128/JB.06244-11 (2012).
- 1089 12 Ogata, H. *et al.* Genome sequence of *Rickettsia bellii* illuminates the role of amoebae  
1090 in gene exchanges between intracellular pathogens. *PLoS Genet* **2**, e76,  
1091 doi:10.1371/journal.pgen.0020076 (2006).
- 1092 13 Blanc, G. *et al.* Lateral gene transfer between obligate intracellular bacteria:  
1093 evidence from the *Rickettsia massiliae* genome. *Genome Res* **17**, 1657-1664,  
1094 doi:10.1101/gr.6742107 (2007).
- 1095 14 Londono, A. F. *et al.* Whole-Genome Sequence of *Rickettsia parkeri* Strain Atlantic  
1096 Rainforest, Isolated from a Colombian Tick. *Microbiol Resour Announc* **8**,  
1097 doi:10.1128/MRA.00684-19 (2019).
- 1098 15 Gillespie, J. J. *et al.* Genomic diversification in strains of *Rickettsia felis* Isolated from  
1099 different arthropods. *Genome Biol Evol* **7**, 35-56, doi:10.1093/gbe/evu262 (2014).

- 1100 16 Felsheim, R., Kurtti, T. & Munderloh, U. Genome sequence of the endosymbiont  
1101 *Rickettsia peacockii* and comparison with virulent *Rickettsia rickettsii*: identification  
1102 of virulence factors. *PLoS One* **4**, e8361, doi:10.1371/journal.pone.0008361 (2009).
- 1103 17 Cho, N., Kim, H., Lee, J. & Kim, I. The *Orientia tsutsugamushi* genome reveals massive  
1104 proliferation of conjugative type IV secretion system and host– cell interaction  
1105 genes. *PNAS* **104**, 7981-7986 (2007).
- 1106 18 Hagen, R., Verhoeve, V., Gillespie, J. & Driscoll, T. in *Genome Biol Evol* Vol. 10(12)  
1107 3218-3229 (2018).
- 1108 19 Mika-Gospodorz, B. *et al.* Dual RNA-seq of *Orientia tsutsugamushi* informs on host-  
1109 pathogen interactions for this neglected intracellular human pathogen. *Nat Commun*  
1110 **11**, 3363, doi:10.1038/s41467-020-17094-8 (2020).
- 1111 20 Hagen, R., Verhoeve, V., Gillespie, J. & Driscoll, T. Conjugative transposons and their  
1112 cargo genes vary across natural populations of *Rickettsia buchneri* infecting the tick  
1113 *Ixodes scapularis*. *Genome Biol Evol* (2018).
- 1114 21 Nakayama, K. *et al.* Genome comparison and phylogenetic analysis of *Orientia*  
1115 *tsutsugamushi* strains. *DNA Res* **17**, 281-291, doi:10.1093/dnares/dsq018 (2010).
- 1116 22 Atwal, S. *et al.* The obligate intracellular bacterium *Orientia tsutsugamushi*  
1117 differentiates into a developmentally distinct extracellular state. *Nat Commun* **13**,  
1118 3603, doi:10.1038/s41467-022-31176-9 (2022).
- 1119 23 Atkinson, G., Tenson, T. & Haurlyuk, V. The RelA/SpoT homolog (RSH) superfamily:  
1120 distribution and functional evolution of ppGpp synthetases and hydrolases across  
1121 the tree of life. *PLoS One* **6**, e23479, doi:10.1371/journal.pone.0023479 (2011).
- 1122 24 Haurlyuk, V., Atkinson, G., Murakami, K., Tenson, T. & Gerdes, K. Recent functional  
1123 insights into the role of (p)ppGpp in bacterial physiology. *Nat Rev Microbiol* **13**, 298-  
1124 309, doi:10.1038/nrmicro3448 (2015).
- 1125 25 Mosavi, L., Minor, D. & Peng, Z. Consensus-derived structural determinants of the  
1126 ankyrin repeat motif. *Proc Natl Acad Sci U S A* **99**, 16029-16034,  
1127 doi:10.1073/pnas.252537899 (2002).
- 1128 26 Jernigan, K. K. & Bordenstein, S. R. Ankyrin domains across the Tree of Life. *PeerJ* **2**,  
1129 e264, doi:10.7717/peerj.264 (2014).
- 1130 27 Frank, A. C. Molecular host mimicry and manipulation in bacterial symbionts. *FEMS*  
1131 *Microbiol Lett* **366**, doi:10.1093/femsle/fnz038 (2019).
- 1132 28 VieBrock, L. *et al.* *Orientia tsutsugamushi* ankyrin repeat-containing protein family  
1133 members are Type 1 secretion system substrates that traffic to the host cell  
1134 endoplasmic reticulum. *Front Cell Infect Microbiol* **4**, 186,  
1135 doi:10.3389/fcimb.2014.00186 (2014).
- 1136 29 Beyer, A. *et al.* *Orientia tsutsugamushi* Strain Ikeda Ankyrin Repeat-Containing  
1137 Proteins Recruit SCF1 Ubiquitin Ligase Machinery via Poxvirus-Like F-box Motifs. *J*  
1138 *Bacteriol*, doi:10.1128/JB.00276-15 (2015).
- 1139 30 Beyer, A. *et al.* *Orientia tsutsugamushi* Ank9 is a multifunctional effector that utilizes  
1140 a novel GRIP-like Golgi localization domain for Golgi-to-endoplasmic reticulum  
1141 trafficking and interacts with host COPB2. *Cell Microbiol*, doi:10.1111/cmi.12727  
1142 (2017).
- 1143 31 Evans, S., Rodino, K., Adcox, H. & Carlyon, J. *Orientia tsutsugamushi* uses two Ank  
1144 effectors to modulate NF- $\kappa$ B p65 nuclear transport and inhibit NF- $\kappa$ B transcriptional  
1145 activation. *PLoS Pathog* **14**, e1007023, doi:10.1371/journal.ppat.1007023 (2018).



- 1146 32 Adcox, H. E. *et al.* Orientia tsutsugamushi Nucleomodulin Ank13 Exploits the RaDAR  
1147 Nuclear Import Pathway To Modulate Host Cell Transcription. *mBio* **12**, e0181621,  
1148 doi:10.1128/mBio.01816-21 (2021).
- 1149 33 Kipreos, E. T. & Pagano, M. The F-box protein family. *Genome Biol* **1**, REVIEWS3002,  
1150 doi:10.1186/gb-2000-1-5-reviews3002 (2000).
- 1151 34 Perez-Riba, A. & Itzhaki, L. S. The tetratricopeptide-repeat motif is a versatile  
1152 platform that enables diverse modes of molecular recognition. *Curr Opin Struct Biol*  
1153 **54**, 43-49, doi:10.1016/j.sbi.2018.12.004 (2019).
- 1154 35 Bang, S. *et al.* Inhibition of eukaryotic translation by tetratricopeptide-repeat  
1155 proteins of Orientia tsutsugamushi. *J Microbiol* **54**, 136-144, doi:10.1007/s12275-  
1156 016-5599-5 (2016).
- 1157 36 Kaur, S. *et al.* TolC-dependent secretion of an ankyrin repeat-containing protein of  
1158 Rickettsia typhi. *J Bacteriol* **194**, 4920-4932, doi:10.1128/JB.00793-12 (2012).
- 1159 37 Johnson, C. & Grossman, A. Integrative and Conjugative Elements (ICEs): What They  
1160 Do and How They Work. *Annu Rev Genet* **49**, 577-601, doi:10.1146/annurev-genet-  
1161 112414-055018 (2015).
- 1162 38 Belfort, M. & Lambowitz, A. M. Group II Intron RNPs and Reverse Transcriptases:  
1163 From Retroelements to Research Tools. *Cold Spring Harb Perspect Biol* **11**,  
1164 doi:10.1101/cshperspect.a032375 (2019).
- 1165 39 Siguier, P., Gournayre, E. & Chandler, M. Bacterial insertion sequences: their  
1166 genomic impact and diversity. *FEMS Microbiol Rev* **38**, 865-891, doi:10.1111/1574-  
1167 6976.12067 (2014).
- 1168 40 Wang, G. *et al.* Bacteriophage WO Can Mediate Horizontal Gene Transfer in  
1169 Endosymbiotic Wolbachia Genomes. *Front Microbiol* **7**, 1867,  
1170 doi:10.3389/fmicb.2016.01867 (2016).
- 1171 41 Arndt, D. *et al.* PHASTER: a better, faster version of the PHAST phage search tool.  
1172 *Nucleic Acids Res* **44**, W16-21, doi:10.1093/nar/gkw387 (2016).
- 1173 42 Zhou, Y., Liang, Y., Lynch, K. H., Dennis, J. J. & Wishart, D. S. PHAST: a fast phage  
1174 search tool. *Nucleic Acids Res* **39**, W347-352, doi:10.1093/nar/gkr485 (2011).
- 1175 43 Gillespie, J. *et al.* Secretome of obligate intracellular Rickettsia. *FEMS Microbiol Rev*,  
1176 doi:10.1111/1574-6976.12084 (2014).
- 1177 44 Lin, M., Zhang, C., Gibson, K. & Rikihisa, Y. Analysis of complete genome sequence of  
1178 Neorickettsia risticii: causative agent of Potomac horse fever. *Nucleic Acids Res* **37**,  
1179 6076-6091, doi:10.1093/nar/gkp642 (2009).
- 1180 45 Gillespie, J. *et al.* Phylogenomics reveals a diverse Rickettsiales type IV secretion  
1181 system. *Infect Immun* **78**, 1809-1823, doi:10.1128/IAI.01384-09 (2010).
- 1182 46 Matson, S. W. & Ragonese, H. The F-plasmid Tral protein contains three functional  
1183 domains required for conjugative DNA strand transfer. *J Bacteriol* **187**, 697-706,  
1184 doi:10.1128/JB.187.2.697-706.2005 (2005).
- 1185 47 Scherzinger, E., Lurz, R., Otto, S. & Dobrinski, B. In vitro cleavage of double- and  
1186 single-stranded DNA by plasmid RSF1010-encoded mobilization proteins. *Nucleic*  
1187 *Acids Res* **20**, 41-48, doi:10.1093/nar/20.1.41 (1992).
- 1188 48 Escobar, M. A. & Dandekar, A. M. Agrobacterium tumefaciens as an agent of disease.  
1189 *Trends Plant Sci* **8**, 380-386, doi:10.1016/S1360-1385(03)00162-6 (2003).
- 1190 49 Weinert, L. A., Welch, J. J. & Jiggins, F. M. Conjugation genes are common  
1191 throughout the genus Rickettsia and are transmitted horizontally. *Proc Biol Sci* **276**,  
1192 3619-3627, doi:10.1098/rspb.2009.0875 (2009).

- 1193 50 Verhoeve, V. I., Lehman, S. S., Driscoll, T. P., Beckmann, J. F. & Gillespie, J. J.  
1194 Metagenome diversity illuminates origins of pathogen effectors. *bioRxiv*,  
1195 doi:10.1101/2023.02.26.530123 (2023).
- 1196 51 Gillespie, J. J. *et al.* An anomalous type IV secretion system in Rickettsia is  
1197 evolutionarily conserved. *PLoS One* **4**, e4833, doi:10.1371/journal.pone.0004833  
1198 (2009).
- 1199 52 Gillespie, J. J. *et al.* The Rickettsia type IV secretion system: unrealized complexity  
1200 mired by gene family expansion. *Pathog Dis* **74**, doi:10.1093/femspd/ftw058 (2016).
- 1201 53 Gillespie, J. *et al.* Structural Insight into How Bacteria Prevent Interference between  
1202 Multiple Divergent Type IV Secretion Systems. *MBio* **6**, e01867-01815,  
1203 doi:10.1128/mBio.01867-15 (2015).
- 1204 54 Verhoeve, V. I. & Gillespie, J. J. Origin of rickettsial host dependency unravelled. *Nat*  
1205 *Microbiol* **7**, 1110-1111, doi:10.1038/s41564-022-01187-9 (2022).
- 1206 55 Suttén, E. L. *et al.* Anaplasma marginale type IV secretion system proteins VirB2,  
1207 VirB7, VirB11, and VirD4 are immunogenic components of a protective bacterial  
1208 membrane vaccine. *Infect Immun* **78**, 1314-1325, doi:10.1128/IAI.01207-09 (2010).
- 1209 56 Oyler, B. *et al.* Rickettsia typhi peptidoglycan mapping with data-dependent tandem  
1210 mass spectrometry. *BioRxiv* (2023).
- 1211 57 Figueroa-Cuilan, W. M. *et al.* Quantitative analysis of morphogenesis and growth  
1212 dynamics in an obligate intracellular bacterium. *Mol Biol Cell*, mbcE23010023,  
1213 doi:10.1091/mbc.E23-01-0023 (2023).
- 1214 58 Atwal, S. *et al.* Evidence for a peptidoglycan-like structure in Orientia tsutsugamushi.  
1215 *Mol Microbiol* **105**, 440-452, doi:10.1111/mmi.13709 (2017).
- 1216 59 Atwal, S. *et al.* Discovery of a Diverse Set of Bacteria That Build Their Cell Walls  
1217 without the Canonical Peptidoglycan Polymerase aPBP. *mBio* **12**, e0134221,  
1218 doi:10.1128/mBio.01342-21 (2021).
- 1219 60 Gillespie, J. J. & Salje, J. Orientia and Rickettsia: different flowers from the same  
1220 garden. *Curr Opin Microbiol* **74**, 102318, doi:10.1016/j.mib.2023.102318 (2023).
- 1221 61 Rennoll-Bankert, K. *et al.* RalF-Mediated Activation of Arf6 Controls Rickettsia typhi  
1222 Invasion by Co-Opting Phosphoinositol Metabolism. *Infect Immun* **84**, 3496-3506,  
1223 doi:10.1128/IAI.00638-16 (2016).
- 1224 62 Lehman, S. *et al.* The Rickettsial Ankyrin Repeat Protein 2 Is a Type IV Secreted  
1225 Effector That Associates with the Endoplasmic Reticulum. *mBio* **9**, e00975-00918,  
1226 doi:10.1128/mBio.00975-18 (2018).
- 1227 63 Voss, O. *et al.* Risk1, a Phosphatidylinositol 3-Kinase Effector, Promotes Rickettsia  
1228 typhi Intracellular Survival. *mBio* **11**, doi:10.1128/mBio.00820-20 (2020).
- 1229 64 Aistleitner, K., Clark, T., Dooley, C. & Hackstadt, T. Selective fragmentation of the  
1230 trans-Golgi apparatus by Rickettsia rickettsii. *PLoS Pathog* **16**, e1008582,  
1231 doi:10.1371/journal.ppat.1008582 (2020).
- 1232 65 Lockwood, S. *et al.* Identification of Anaplasma marginale type IV secretion system  
1233 effector proteins. *PLoS One* **6**, e27724, doi:10.1371/journal.pone.0027724 (2011).
- 1234 66 Lin, M., den Dulk-Ras, A., Hooykaas, P. & Rikihisa, Y. Anaplasma phagocytophilum  
1235 AnkA secreted by type IV secretion system is tyrosine phosphorylated by Abl-1 to  
1236 facilitate infection. *Cell Microbiol* **9**, 2644-2657, doi:10.1111/j.1462-  
1237 5822.2007.00985.x (2007).



- 1238 67 Niu, H., Kozjak-Pavlovic, V., Rudel, T. & Rikihisa, Y. Anaplasma phagocytophilum Ats-1  
1239 is imported into host cell mitochondria and interferes with apoptosis induction. *PLoS*  
1240 *Pathog* **6**, e1000774, doi:10.1371/journal.ppat.1000774 (2010).
- 1241 68 Rikihisa, Y. & Lin, M. Anaplasma phagocytophilum and Ehrlichia chaffeensis type IV  
1242 secretion and Ank proteins. *Curr Opin Microbiol* **13**, 59-66,  
1243 doi:10.1016/j.mib.2009.12.008 (2010).
- 1244 69 Rikihisa, Y., Lin, M. & Niu, H. Type IV secretion in the obligatory intracellular  
1245 bacterium Anaplasma phagocytophilum. *Cell Microbiol* **12**, 1213-1221,  
1246 doi:10.1111/j.1462-5822.2010.01500.x (2010).
- 1247 70 Park, J. M. *et al.* An Anaplasma phagocytophilum T4SS effector, AteA, is essential for  
1248 tick infection. *bioRxiv*, doi:10.1101/2023.02.06.527355 (2023).
- 1249 71 Zhu, J. *et al.* Development of TEM-1 beta-lactamase based protein translocation  
1250 assay for identification of Anaplasma phagocytophilum type IV secretion system  
1251 effector proteins. *Sci Rep* **9**, 4235, doi:10.1038/s41598-019-40682-8 (2019).
- 1252 72 Kim, Y., Wang, J., Clemens, E. G., Grab, D. J. & Dumler, J. S. Anaplasma  
1253 phagocytophilum Ankyrin A Protein (AnkA) Enters the Nucleus Using an Importin-  
1254 beta-, RanGTP-Dependent Mechanism. *Front Cell Infect Microbiol* **12**, 828605,  
1255 doi:10.3389/fcimb.2022.828605 (2022).
- 1256 73 Liu, H., Bao, W., Lin, M., Niu, H. & Rikihisa, Y. Ehrlichia type IV secretion effector  
1257 ECH0825 is translocated to mitochondria and curbs ROS and apoptosis by  
1258 upregulating host MnSOD. *Cell Microbiol* **14**, 1037-1050, doi:10.1111/j.1462-  
1259 5822.2012.01775.x (2012).
- 1260 74 Rikihisa, Y. The "Biological Weapons" of Ehrlichia chaffeensis: Novel Molecules and  
1261 Mechanisms to Subjugate Host Cells. *Front Cell Infect Microbiol* **11**, 830180,  
1262 doi:10.3389/fcimb.2021.830180 (2021).
- 1263 75 Yan, Q. *et al.* Iron robbery by intracellular pathogen via bacterial effector-induced  
1264 ferritinophagy. *Proc Natl Acad Sci U S A* **118**, doi:10.1073/pnas.2026598118 (2021).
- 1265 76 Yan, Q. *et al.* Ehrlichia type IV secretion system effector Etf-2 binds to active RAB5  
1266 and delays endosome maturation. *Proc Natl Acad Sci U S A* **115**, E8977-E8986,  
1267 doi:10.1073/pnas.1806904115 (2018).
- 1268 77 Tesson, F. *et al.* Systematic and quantitative view of the antiviral arsenal of  
1269 prokaryotes. *Nat Commun* **13**, 2561, doi:10.1038/s41467-022-30269-9 (2022).
- 1270 78 Rocha, E. P. C. & Bikard, D. Microbial defenses against mobile genetic elements and  
1271 viruses: Who defends whom from what? *PLoS Biol* **20**, e3001514,  
1272 doi:10.1371/journal.pbio.3001514 (2022).
- 1273 79 Doron, S. *et al.* Systematic discovery of antiphage defense systems in the microbial  
1274 pangenome. *Science* **359**, doi:10.1126/science.aar4120 (2018).
- 1275 80 Abby, S. S., Neron, B., Menager, H., Touchon, M. & Rocha, E. P. MacSyFinder: a  
1276 program to mine genomes for molecular systems with an application to CRISPR-Cas  
1277 systems. *PLoS One* **9**, e110726, doi:10.1371/journal.pone.0110726 (2014).
- 1278 81 Tal, N. *et al.* Cyclic CMP and cyclic UMP mediate bacterial immunity against phages.  
1279 *Cell* **184**, 5728-5739 e5716, doi:10.1016/j.cell.2021.09.031 (2021).
- 1280 82 Letunic, I., Khedkar, S. & Bork, P. SMART: recent updates, new developments and  
1281 status in 2020. *Nucleic Acids Research* **49**, D458-D460, doi:10.1093/nar/gkaa937  
1282 (2021).
- 1283 83 Song, Y., Peisach, D., Pioszak, A. A., Xu, Z. & Ninfa, A. J. Crystal structure of the C-  
1284 terminal domain of the two-component system transmitter protein nitrogen

- 1285 regulator II (NRII; NtrB), regulator of nitrogen assimilation in Escherichia coli.  
1286 *Biochemistry* **43**, 6670-6678 (2004).
- 1287 84 Bellon, S. *et al.* Crystal structures of Escherichia coli topoisomerase IV ParE subunit  
1288 (24 and 43 kilodaltons): a single residue dictates differences in novobiocin potency  
1289 against topoisomerase IV and DNA gyrase. *Antimicrobial agents and chemotherapy*  
1290 **48**, 1856-1864 (2004).
- 1291 85 Wright, L. *et al.* Structure-activity relationships in purine-based inhibitor binding to  
1292 HSP90 isoforms. *Chemistry & biology* **11**, 775-785 (2004).
- 1293 86 Mascher, T., Helmann, J. D. & Udden, G. Stimulus perception in bacterial signal-  
1294 transducing histidine kinases. *Microbiology and molecular biology reviews* **70**, 910-  
1295 938 (2006).
- 1296 87 Hagemann, M. *et al.* Identification of the DNA methyltransferases establishing the  
1297 methylome of the cyanobacterium *Synechocystis* sp. PCC 6803. *DNA Research* **25**,  
1298 343-352 (2018).
- 1299 88 Leipe, D. D., Aravind, L., Grishin, N. V. & Koonin, E. V. The bacterial replicative  
1300 helicase DnaB evolved from a RecA duplication. *Genome research* **10**, 5-16 (2000).
- 1301 89 Siguier, P., Perochon, J., Lestrade, L., Mahillon, J. & Chandler, M. ISfinder: the  
1302 reference centre for bacterial insertion sequences. *Nucleic Acids Res* **34**, D32-36,  
1303 doi:10.1093/nar/gkj014 (2006).
- 1304 90 Groth, A. C. & Calos, M. P. Phage integrases: biology and applications. *Journal of*  
1305 *molecular biology* **335**, 667-678 (2004).
- 1306 91 Abremski, K. E. & Hoess, R. H. Evidence for a second conserved arginine residue in  
1307 the integrase family of recombination proteins. *Protein Engineering, Design and*  
1308 *Selection* **5**, 87-91 (1992).
- 1309 92 Gladyshev, E. A. & Arhipova, I. R. A widespread class of reverse transcriptase-  
1310 related cellular genes. *Proceedings of the National Academy of Sciences* **108**, 20311-  
1311 20316 (2011).
- 1312 93 Blocker, F. J. *et al.* Domain structure and three-dimensional model of a group II  
1313 intron-encoded reverse transcriptase. *Rna* **11**, 14-28 (2005).
- 1314 94 Zhao, J. & Lambowitz, A. M. A bacterial group II intron-encoded reverse transcriptase  
1315 localizes to cellular poles. *Proceedings of the National Academy of Sciences* **102**,  
1316 16133-16140 (2005).
- 1317 95 Nesmelova, I. V. & Hackett, P. B. DDE transposases: Structural similarity and  
1318 diversity. *Advanced drug delivery reviews* **62**, 1187-1195 (2010).
- 1319 96 Knizewski, L., Kinch, L. N., Grishin, N. V., Rychlewski, L. & Ginalski, K. Realm of PD-  
1320 (D/E) XK nuclease superfamily revisited: detection of novel families with modified  
1321 transitive meta profile searches. *BMC structural biology* **7**, 1-9 (2007).
- 1322 97 Davies, D. R., Goryshin, I. Y., Reznikoff, W. S. & Rayment, I. Three-dimensional  
1323 structure of the Tn 5 synaptic complex transposition intermediate. *Science* **289**, 77-  
1324 85 (2000).
- 1325

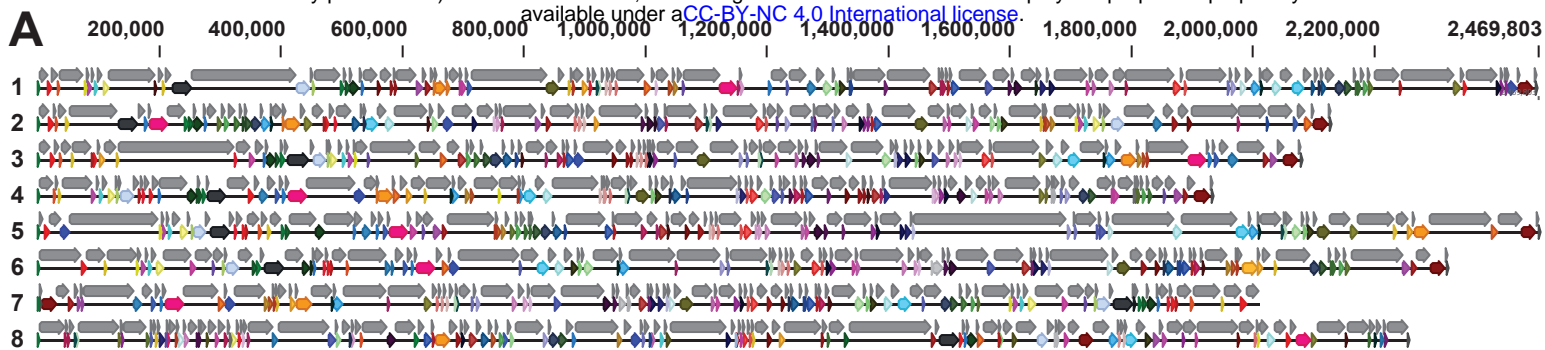

**B**

| Ot strain | Total RAGE | Complete RAGE w/o truncated/split genes | Complete RAGE w/ truncated/split genes | Incomplete RAGE | No. IR regions | No. isolated mobilisation genes | No. isolated cargo genes | No. isolated HP-encoding genes |
|-----------|------------|-----------------------------------------|----------------------------------------|-----------------|----------------|---------------------------------|--------------------------|--------------------------------|
| 1 Gilliam | 91         | 3                                       | 7                                      | 81              | 84             | 52                              | 10                       | 49                             |
| 2 Boryong | 84         | 0                                       | 1                                      | 83              | 84             | 25                              | 17                       | 65                             |
| 3 UT76    | 71         | 0                                       | 2                                      | 69              | 84             | 31                              | 11                       | 52                             |
| 4 UT176   | 72         | 0                                       | 3                                      | 69              | 84             | 42                              | 9                        | 40                             |
| 5 Karp    | 77         | 0                                       | 13                                     | 64              | 84             | 25                              | 13                       | 39                             |
| 6 Kato    | 81         | 1                                       | 10                                     | 70              | 84             | 33                              | 12                       | 54                             |
| 7 Ikeda   | 76         | 0                                       | 0                                      | 76              | 84             | 36                              | 16                       | 57                             |
| 8 TA686   | 93         | 0                                       | 7                                      | 86              | 84             | 33                              | 12                       | 46                             |

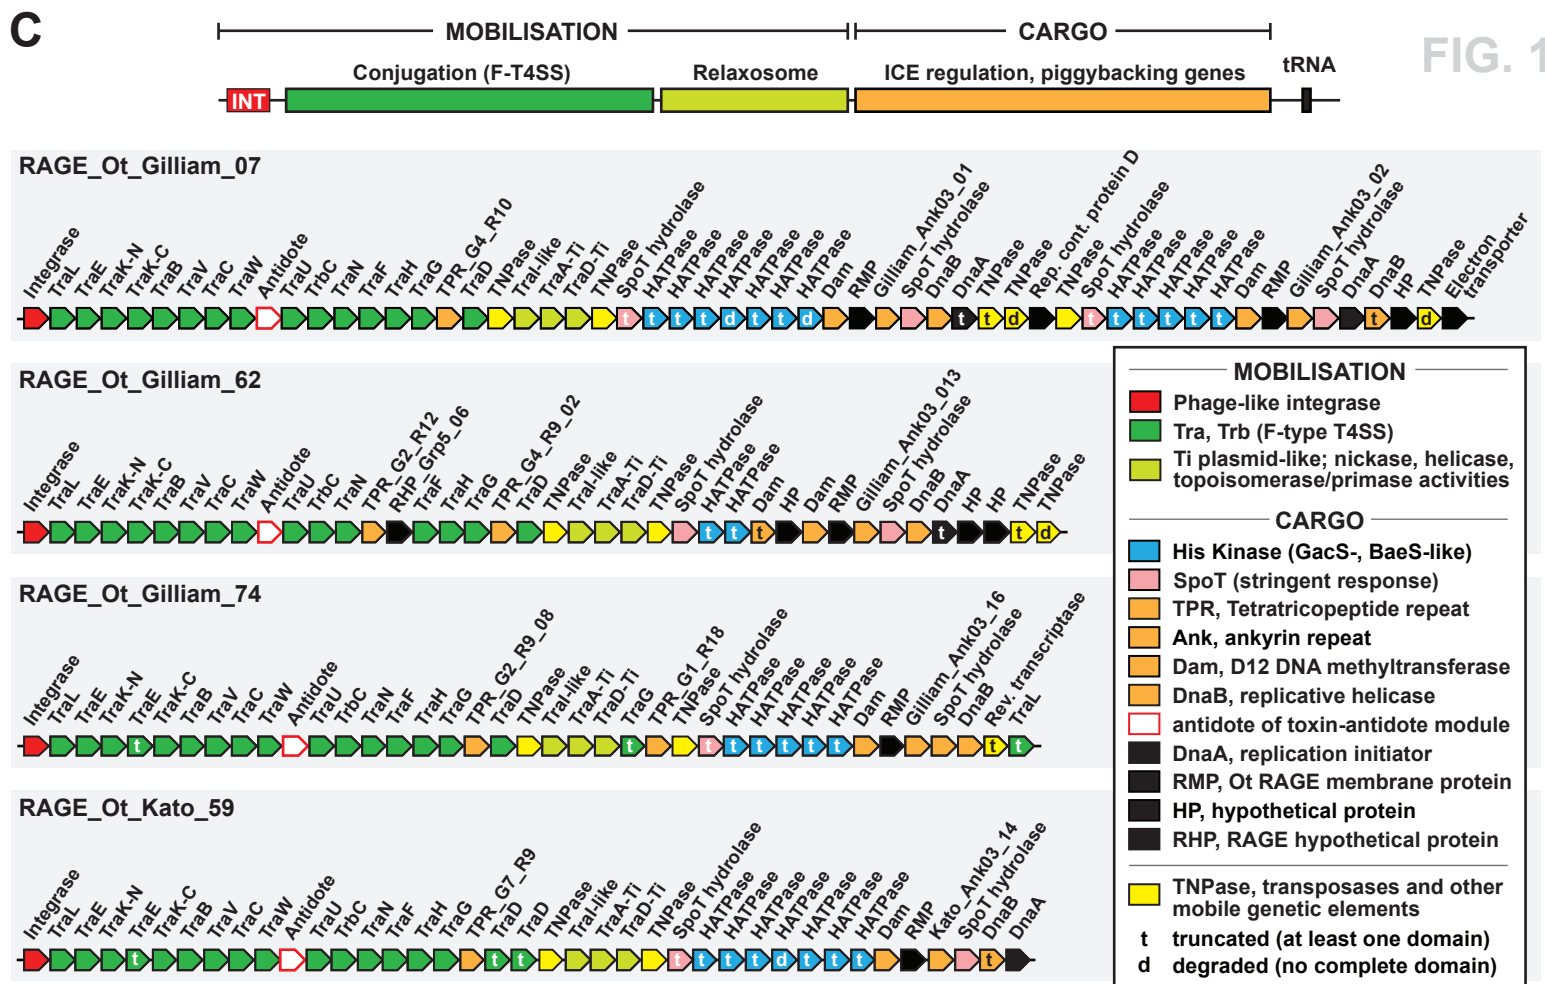

FIG. 1

**A**

|                               |                                                                       | Gilliam | Boryong | UT76 | UT176 | Karp | Kato | Ikeda | TA686 |
|-------------------------------|-----------------------------------------------------------------------|---------|---------|------|-------|------|------|-------|-------|
| <b>RAGE-associated genes</b>  | <b>Description</b>                                                    |         |         |      |       |      |      |       |       |
| 18 kDa heat shock protein     | ACD_sHsps-like: alpha-crystallin-type small heat shock protein        | X       | X       | X    | X     | X    | X    | X     | X     |
| MidA family                   | SAM-dependent methyltransferase                                       | 2       | 2       | 2    | 2     | 2    | 2    | 2     | 2     |
| TimA                          | Tim44/TimA family of putative adaptor protein (transport)             | 1       | 1       | 1    | 1     | 1    | 1    | 1     | 1     |
| glpE                          | Thiosulfate sulfurtransferase GlpE                                    | X       | X       | X    | X     | X    | X    | X     | X     |
| cspC                          | Cold shock protein, CspA family                                       | X       | X       | X    | X     | X    | X    | X     | X     |
| gcvT                          | Aminomethyltransferase (glycine degradation)                          | X       | X       | X    | X     | X    | X    | X     | X     |
| MdlB                          | ABC transporter ATP-binding protein (intracellular bacteria hallmark) | 2       | 2       | 2,2  | 2     | 2    | 2,2  | 2     | 2     |
| lipB                          | Octanoyltransferase (octanoyl-ACP to lipoate-dependent enzymes)       | X       | X       | 2    | X     | X    | X    | X     | X     |
| DDE_Tnp_1_3                   | Transposase DDE domain or inactive derivative                         | X       | X       | X    | X     | X    | X    | X     | 5     |
| uvrA                          | Excinuclease ABC subunit A                                            | X       | X       | X    | X     | X    | X    | X     | X     |
| pgsA                          | CDP-diacylglycerol-glycerol-3-P 3-phosphatidyltransferase             | X       | X       | X    | X     | X    | X    | X     | X     |
| tyrS                          | Tyrosine-tRNA ligase                                                  | X       | X       | X    | X     | X    | X    | X     | X     |
| lacA                          | Ribose-5-phosphate isomerase                                          | X       | X       | X    | X     | X    | X    | X     | X     |
| dapD                          | 2,3,4,5-tetrahydropyridine-2,6-dicarboxylate N-succinyltransferase    | X       | X       | X    | X     | X    | X    | X     | X     |
| ScaA                          | ScaA autotransporter protein                                          | X       | X       | X    | X     | X    | X    | X     | X     |
| MdtL                          | Multidrug resistance protein MdtL                                     | X       | X       | X    | X     | X    | X    | X     | X     |
| pld                           | Phospholipase D family protein                                        | X       | X       | X    | X     | X    | X    | X     | X     |
| uvrD                          | DNA helicase II                                                       | 1       | 1       | 1    | 1     | 1    | 1    | 1     | 1     |
| rpoZ                          | DNA-directed RNA polymerase subunit omega                             | X       | X       | X    | X     | X    | X    | X     | X     |
| bamb                          | Outer membrane protein assembly factor Bamb                           | X       | X       | X    | X     | X    | X    | X     | X     |
| ssb                           | Single-stranded DNA-binding protein                                   | X       | X       | X    | X     | X    | X    | X     | X     |
| PPDK                          | Pyruvate, phosphate dikinase                                          | X       | X       | X    | X     | X    | X    | X     | X     |
| map                           | Type I methionyl aminopeptidase                                       | X       | X       | X    | X     | X    | X    | X     | X     |
| ctaA                          | Heme A synthase (Cytochrome oxidase assembly protein)                 | X       | X       | X    | X     | X    | X    | X     | X     |
| clpP                          | ATP-dependent Clp protease proteolytic subunit                        | X       | X       | X    | X     | X    | X    | X     | X     |
| HipB                          | Transcriptional regulator, contains XRE-family HTH domain             | 2,3     | 4       | 4    | 4     | 4    | 4    | 4     | 4     |
| ScaC                          | ScaC autotransporter (T5SS)                                           | X       | X       | X    | X     | X    | X    | X     | 2     |
| bcr/cflA                      | Bcr/CflA family drug resistance efflux transporter                    | X       | X       | X    | X     | X    | X    | X     | X     |
| Sco1                          | Cytochrome oxidase Cu insertion factor                                | X       | X       | X    | X     | X    | X    | X     | X     |
| rne/mg                        | Ribonuclease E/G                                                      | X       | X       | X    | X     | X    | X    | X     | X     |
| trpS                          | Tryptophan-tRNA ligase                                                | X       | X       | X    | X     | X    | X    | X     | X     |
| SLC5-6-like_sbd (NT): HK (CT) | Sodium solute symporter fused to sensor HK/response regulator         | X       | X       | X    | X     | X    | X    | X     | X     |
| rppH                          | RNA pyrophosphohydrolase                                              | X       | X       | X    | X     | X    | X    | X     | X     |
| ndk                           | Nucleoside-diphosphate kinase                                         | X       | X       | X    | X     | X    | X    | X     | X     |
| cyaY                          | Iron donor protein CyaY                                               | X       | X       | X    | X     | X    | X    | X     | X     |
| Dam                           | Site-specific DNA-adenine methylase                                   | X       | X       | X    | X     | X    | X    | X     | X     |
| rSAM_XyeB                     | Radical SAM/SPASM domain peptide maturase, XyeB family                | X       | X       | X    | X     | X    | X    | X     | X     |
| YifB                          | Predicted ATPase with chaperone activity                              | 3       | 3       | 4    | 4     | 4    | 4    | 4     | 3     |
| prmA                          | Ribosomal protein L11 methyltransferase                               | X       | X       | X    | X     | X    | X    | X     | X     |
| Abhydrolase_6                 | Alpha/beta hydrolase family (MhpC-like)                               | X       | X       | X    | X     | X    | X    | X     | X     |
| prfB/prfB                     | Peptide chain release factor RF-2                                     | X       | X       | X    | X     | X    | X    | X     | X     |
| gpgP                          | Glucosyl-3-phosphoglycerate phosphatase                               | X       | X       | X    | X     | X    | X    | X     | X     |
| HPD                           | 4-hydroxyphenylpyruvate dioxygenase (tyrosine degradation)            | X       | X       | X    | X     | X    | X    | X     | X     |
| sfp                           | 4'-phosphopantetheinyl transferase sfp                                | X       | X       | X    | X     | X    | X    | X     | X     |
| glyA                          | Serine hydroxymethyltransferase                                       | 1       | 1       | 1    | 1     | 1    | 1    | 1     | 1     |
| acoA                          | Acetoin:2,6-dichlorophenolindophenol oxidoreductase subunit alpha     | X       | X       | X    | X     | X    | X    | X     | X     |
| HNHc                          | Endonuclease signature (viral, prokaryotic, and eukaryotic proteins)  | X       | X       | X    | X     | X    | X    | X     | X     |
| fol_rel_CADD                  | Putative folate metabolism protein, CADD family                       | X       | X       | X    | X     | X    | X    | X     | X     |
| xseB                          | Exodeoxyribonuclease VII small subunit                                | 1       | 1       | 1    | 1     | 1    | 1    | 1     | 1     |
| ProP                          | Proline/glycine betaine transporter                                   | 6       | 6       | 6    | 6     | 6    | 6    | 6     | 5     |
| ltrA                          | Group II intron-encoded protein LtrA                                  | X       | X       | X    | X     | X    | X    | X     | X     |
| lysS                          | lysine-tRNA ligase                                                    | 1       | 1       | 1    | 1     | 1    | 1    | 1     | 1     |
| FolP                          | Dihydropteroate synthase                                              | X       | X       | X    | X     | X    | X    | X     | X     |
| aroK                          | Shikimate kinase 1                                                    | X       | X       | X    | X     | X    | X    | X     | X     |
| menG                          | 2-phytyl-1,4-naphthoquinone methyltransferase                         | X       | X       | X    | X     | X    | X    | X     | X     |
| dnaQ                          | DNA polymerase III subunit epsilon                                    | 1       | 1       | 1    | 1     | 1    | 1    | 1     | 1     |
| gpmA                          | 2,3-bisphosphoglycerate-dependent phosphoglycerate mutase             | X       | X       | X    | X     | X    | X    | X     | X     |
| pthXo1                        | pthXo1 CDS, TAL effector protein PthXo1                               | X       | X       | X    | X     | X    | X    | X     | X     |
| secA-like                     | preprotein translocase SecA subunit-like protein                      | 5       | X       | 3    | X     | 8    | 3    | 3     | 8     |
| SenC                          | Required for optimal cytochrome c oxidase activity                    | X       | X       | X    | X     | X    | X    | X     | X     |
| mta                           | HTH-type transcriptional activator mta                                | X       | X       | X    | X     | X    | X    | X     | X     |
| prfB                          | peptide chain release factor RF-2                                     | X       | X       | X    | X     | X    | X    | X     | X     |

**B**

|                     |                                                         | Gilliam | Boryong | UT76    | UT176  | Karp    | Kato   | Ikeda  | TA686   |
|---------------------|---------------------------------------------------------|---------|---------|---------|--------|---------|--------|--------|---------|
| <b>MOBILISATION</b> | Phage-like integrases (RAGE insertion)                  | 95      | 77      | 99      | 58     | 89      | 102    | 83     | 98      |
|                     | Conjugation and relaxosome proteins ( <i>tra</i> genes) | 647     | 664     | 607     | 421    | 686     | 621    | 512    | 572     |
|                     | Membrane proteins unique to RAGE                        | 32      | 56      | 24      | 22     | 41      | 30     | 26     | 27      |
|                     | Dam, D12 DNA methyltransferases                         | 33      | 34      | 29      | 18     | 30      | 26     | 18     | 22      |
|                     | DNA replicative helicases                               | 40      | 54      | 46      | 24     | 52      | 50     | 38     | 53      |
|                     | Multidrug Resistance Proteins/Histidine Kinases         | 103 (5) | 57 (10) | 103 (7) | 50 (7) | 119 (7) | 95 (7) | 82 (8) | 129 (7) |
|                     | SpoT stringent response regulators                      | 64      | 54      | 64      | 36     | 78      | 62     | 62     | 49      |
|                     | Hypothetical Protein-encoding genes                     | 462     | 547     | 419     | 324    | 297     | 464    | 417    | 473     |
|                     | Tetratricopeptide repeat containing proteins            | 48      | 29      | 34      | 31     | 39      | 45     | 21     | 31      |
|                     | Ankyrin repeat containing proteins                      | 62      | 66      | 63      | 53     | 75      | 53     | 47     | 56      |
|                     | Peroxisredoxin                                          | 2       | 2       | 2       | 3      | 5       | 7      | 4      | 5       |
|                     | XthA2 (exodeoxyribonuclease III)                        | 2       | 3 (1)   | 4 (1)   | 2 (1)  | 4 (1)   | 2 (1)  | 4 (1)  | 2       |
|                     | Repeat-containing protein D                             | 5 (1)   | 9       | 3       | 4 (1)  | 3 (1)   | 2 (1)  | 6 (1)  | 2 (1)   |
|                     | Transposase and inactive derivatives (numerous types)   | 634     | 373     | 275     | 531    | 361     | 279    | 350    | 480     |
|                     | Reverse transcriptase                                   | 23      | 64      | 12      | 7      | 20      | 38     | 36     | 38      |
|                     | HNH endonucleases                                       | 1       | 2       | 2       | 0      | 22      | 9      | 1      | 18      |

FIG. 2



**A**

**Membrane proteins**

| Ot strain | Ycca, modulator of Fish protease | Vurt1, vitamin uptake transporter | RhaT | Ot RAGE membrane protein |
|-----------|----------------------------------|-----------------------------------|------|--------------------------|
| Gilliam   | 1                                | 1                                 | 1    | 30                       |
| Boryong   | 1                                | 1                                 | 1    | 18                       |
| UT76      | 1                                | 1                                 | 1    | 23                       |
| UT176     | 1                                | 1                                 | 1    | 20                       |
| Karp      | 1                                | 1                                 | 1    | 38                       |
| Kato      | 1                                | 1                                 | 1    | 28                       |
| Ikeda     | 1                                | 1                                 | 1    | 23                       |
| TA686     | 1                                | 1                                 | 1    | 23                       |

**B**

**Dam, D12 DNA methyltransferases**

| Ot strain | Full length | Truncated | Degraded | Total |
|-----------|-------------|-----------|----------|-------|
| Gilliam   | 26          | 7         | -        | 33    |
| Boryong   | 8           | 26        | -        | 34    |
| UT76      | 11          | 16        | 2        | 29    |
| UT176     | 11          | 7         | -        | 18    |
| Karp      | 18          | 11        | 1        | 30    |
| Kato      | 13          | 12        | 1        | 26    |
| Ikeda     | 10          | 8         | -        | 18    |
| TA686     | 13          | 2         | 7        | 22    |

**C**

**DNA helicases**

| Ot strain | UvrD | DnaB, full length | DnaB, degraded | Total |
|-----------|------|-------------------|----------------|-------|
| Gilliam   | 2    | 21                | 15             | 40    |
| Boryong   | 2    | 1                 | 40             | 54    |
| UT76      | 2    | 12                | 18             | 46    |
| UT176     | 2    | 6                 | 12             | 24    |
| Karp      | 2    | 23                | 19             | 52    |
| Kato      | 2    | 15                | 31             | 50    |
| Ikeda     | 2    | 13                | 19             | 38    |
| TA686     | 2    | 21                | 10             | 53    |

**D**

**Multidrug Resistance Protein (MRP) and Histidine Kinases**

| Ot strain | MRP/NBP35 family ATP binding protein and AAA-ATPases | PurP Na/P <sub>o</sub> symporter | PanF Na/pantothenate symporter | HATPase_c domain protein | HATPase_c dom. protein (degraded) | His phosphotransferase | Two component sensor His kinase | Hybrid His kinase response regulator |   |
|-----------|------------------------------------------------------|----------------------------------|--------------------------------|--------------------------|-----------------------------------|------------------------|---------------------------------|--------------------------------------|---|
| Gilliam   | 1                                                    | 1                                | 4                              | 2                        | 79                                | 18                     | 1                               | 2                                    | 1 |
| Boryong   | 1                                                    | 1                                | 4                              | 2                        | 38                                | 18                     | 1                               | 2                                    | 1 |
| UT76      | 1                                                    | 1                                | 5                              | 2                        | 68                                | 30                     | 1                               | 2                                    | 1 |
| UT176     | 1                                                    | 1                                | 5                              | 2                        | 35                                | 10                     | 1                               | 2                                    | 1 |
| Karp      | 1                                                    | 1                                | 5                              | 2                        | 90                                | 23                     | 1                               | 2                                    | 1 |
| Kato      | 1                                                    | 1                                | 8                              | 2                        | 83                                | 30                     | 1                               | 2                                    | 1 |
| Ikeda     | 1                                                    | 1                                | 7                              | 2                        | 56                                | 20                     | 1                               | 2                                    | 1 |
| TA686     | 1                                                    | 1                                | 5                              | 2                        | 78                                | 45                     | 1                               | 2                                    | 1 |

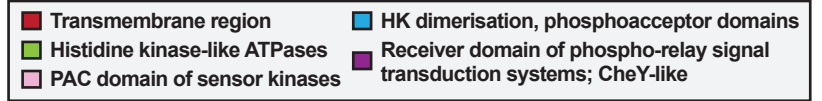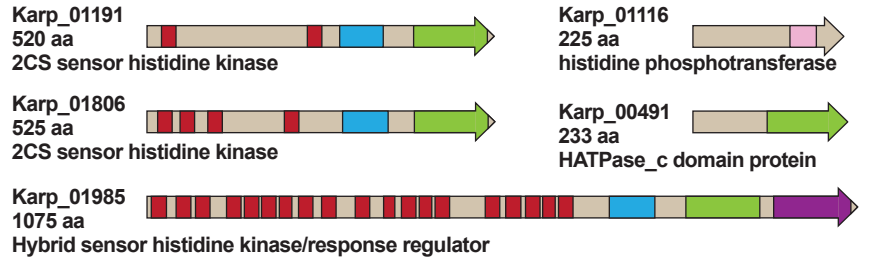

**E**

**SpoT stringent response regulators**

| Ot strain | SpoT-bifunctional (full-length) | SpoT-synthetase (full-length) | SpoT-hydrolase (full-length) | SpoT-hydrolase (truncated) | SpoT-hydrolase (degraded) | HATPase-SpoT chimeric protein | MRC-SpoT chimeric protein |
|-----------|---------------------------------|-------------------------------|------------------------------|----------------------------|---------------------------|-------------------------------|---------------------------|
| Gilliam   | 1                               | 1                             | 42                           | 8                          | 12                        | -                             | -                         |
| Boryong   | 1                               | 1                             | 21                           | 5                          | 26                        | -                             | -                         |
| UT76      | 1                               | 1                             | 23                           | 9                          | 27                        | 1                             | 2                         |
| UT176     | 1                               | 1                             | 18                           | 5                          | 11                        | -                             | -                         |
| Karp      | 1                               | 1                             | 46                           | 11                         | 19                        | -                             | -                         |
| Kato      | 1                               | 1                             | 25                           | 15                         | 19                        | 1                             | -                         |
| Ikeda     | 1                               | 1                             | 16                           | 6                          | 38                        | -                             | -                         |
| TA686     | 1                               | 1                             | 15                           | 5                          | 23                        | 2                             | 2                         |

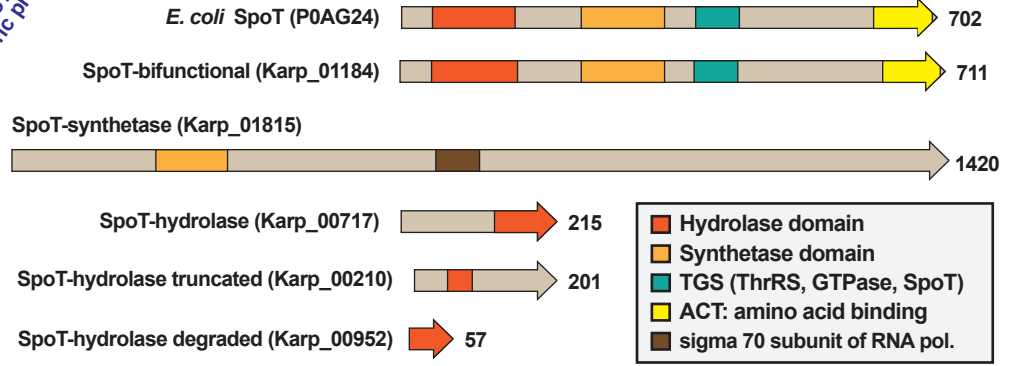

**F**

**HP, Ot RAGE hypothetical proteins**

| Ot strain | DnaA_N | Phage portal protein | Peptidase C48 | Peptidase M61 | Predicted lipase | Zinc ribbon 4 | RHOD | AHH | FISH1 Ser hydrolase | MagZ-like | HNHc nuclease | nal/nt deaminase | BrkZ-like | CdAMP_rec | PDu(A)C | Recombinase | Rvt_1(PF00078) | Rvt_N 19 | RAGE hypo_Gr1 | RAGE hypo_Gr2 | RAGE hypo_Gr3 | RAGE hypo_Gr4 | RAGE hypo_Gr5 | RAGE hypo_Gr6 | RAGE hypo_Gr7 | Unknown domains | Total |
|-----------|--------|----------------------|---------------|---------------|------------------|---------------|------|-----|---------------------|-----------|---------------|------------------|-----------|-----------|---------|-------------|----------------|----------|---------------|---------------|---------------|---------------|---------------|---------------|---------------|-----------------|-------|
| Gilliam   | 23     | 1                    | -             | -             | -                | 1             | 1    | -   | 1                   | -         | -             | 1                | -         | 1         | 3       | -           | -              | -        | 1             | 1             | 2             | -             | 8             | -             | -             | 418             | 462   |
| Boryong   | 12     | 1                    | 1             | -             | -                | 1             | 1    | -   | 1                   | -         | -             | 1                | 1         | -         | -       | -           | -              | 1        | -             | 1             | -             | -             | 2             | -             | -             | 525             | 547   |
| UT76      | 15     | 1                    | 1             | -             | -                | 1             | 1    | -   | -                   | -         | -             | -                | -         | -         | -       | -           | -              | -        | 1             | 2             | 1             | 5             | -             | -             | 391           | 419             |       |
| UT176     | 10     | 1                    | 1             | 1             | 1                | 1             | 1    | -   | -                   | 1         | -             | 3                | -         | -         | -       | -           | -              | -        | 1             | 2             | 1             | 7             | -             | -             | 293           | 324             |       |
| Karp      | 12     | 1                    | 1             | -             | -                | 1             | 1    | 1   | -                   | -         | -             | -                | -         | -         | -       | 1           | -              | -        | 1             | 2             | 1             | 6             | 1             | -             | 280           | 308             |       |
| Kato      | 20     | 1                    | 1             | -             | -                | 1             | 1    | -   | 1                   | -         | -             | 1                | 1         | 1         | -       | -           | -              | -        | 1             | -             | -             | -             | -             | -             | 436           | 464             |       |
| Ikeda     | 17     | 1                    | 1             | -             | -                | 1             | 1    | -   | -                   | -         | -             | 3                | 1         | 1         | -       | -           | -              | -        | 1             | 2             | 1             | 2             | -             | -             | 385           | 417             |       |
| TA686     | 16     | 1                    | -             | -             | 1                | 1             | 1    | 2   | -                   | -         | 1             | -                | -         | 1         | -       | -           | 1              | -        | 1             | 2             | -             | 8             | -             | -             | 437           | 473             |       |

FIG. 4

A

**Ankyrin repeat containing proteins (n = 129)**

— orthologous groups (n = 54) — | — singletons (n = 75) — |

| Ot strain | orthologous groups (n = 54)  |                          |                  |                    |            |           | singletons (n = 75) |               |                  |                    |            |           |
|-----------|------------------------------|--------------------------|------------------|--------------------|------------|-----------|---------------------|---------------|------------------|--------------------|------------|-----------|
|           | No. orthologous groups (OGs) | Tot. proteins (% in OGs) | CC, PRANC, F-box | CC or PRANC, F-box | F-box only | w/o F-box | No. singletons      | Tot. proteins | CC, PRANC, F-box | CC or PRANC, F-box | F-box only | w/o F-box |
| Gilliam   | 25                           | 48, 79%                  | 5                | 5                  | 24         | 14        | 12                  | 15            | -                | 2                  | 5          | 8         |
| Boryong   | 22                           | 36, 67%                  | 4                | 3                  | 7          | 22        | 21                  | 28            | 3                | 2                  | 2          | 21        |
| UT76      | 36                           | 53, 84%                  | 6                | 8                  | 20         | 19        | 8                   | 11            | 2                | 2                  | 5          | 2         |
| UT176     | 29                           | 51, 94%                  | 2                | 9                  | 22         | 18        | 3                   | 3             | -                | -                  | -          | 3         |
| Karp      | 24                           | 66, 88%                  | 3                | 12                 | 35         | 16        | 7                   | 9             | -                | 1                  | 2          | 6         |
| Kato      | 26                           | 51, 93%                  | 6                | 5                  | 24         | 16        | 4                   | 4             | 1                | -                  | -          | 3         |
| Ikeda     | 22                           | 49, 88%                  | 10               | 10                 | 20         | 9         | 7                   | 7             | -                | -                  | -          | 7         |
| TA686     | 20                           | 40, 70%                  | 5                | 5                  | 23         | 7         | 14                  | 17            | 4                | 2                  | 4          | 7         |

B

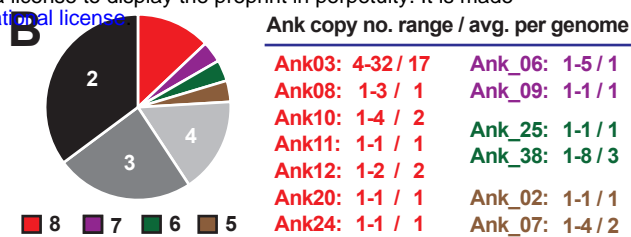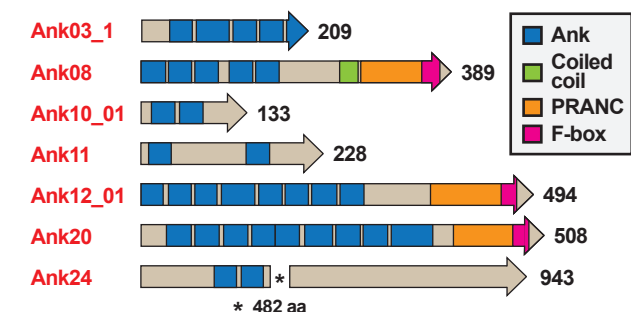

C

**TPR repeat containing proteins**

| Ot strain    | TPR Group |      |     |      |   |      |     |      |     | Total proteins |
|--------------|-----------|------|-----|------|---|------|-----|------|-----|----------------|
|              | 1         | 2    | 3   | 4    | 5 | 6    | 7   | 8    | 9   |                |
| Gilliam      | 14        | 17   | 2   | 6    | - | 1    | 3   | 5    | -   | 48             |
| Boryong      | 7         | 12   | 6   | 1    | - | 1    | 1   | 1    | -   | 29             |
| UT76         | 7         | 15   | 2   | 3    | 2 | 1    | -   | 2    | 2   | 34             |
| UT176        | 9         | 15   | 4   | 1    | - | 1    | -   | 1    | -   | 31             |
| Karp         | 16        | 15   | 3   | 4    | - | 1    | -   | -    | -   | 39             |
| Kato         | 11        | 18   | 2   | 5    | 2 | 1    | 1   | 3    | 2   | 45             |
| Ikeda        | 5         | 5    | 3   | 2    | 2 | -    | -   | 2    | 2   | 21             |
| TA686        | 11        | 15   | -   | 2    | - | 1    | -   | 2    | -   | 31             |
| Repeat range | 1-18      | 1-16 | 1-9 | 3-11 | 2 | 5-11 | 4-9 | 1-10 | 1-2 |                |

D

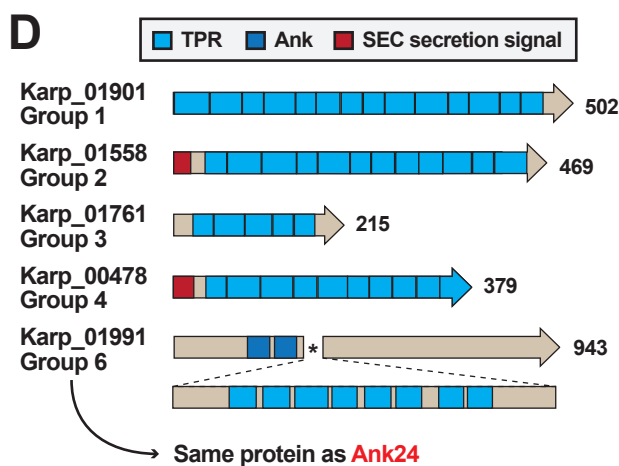

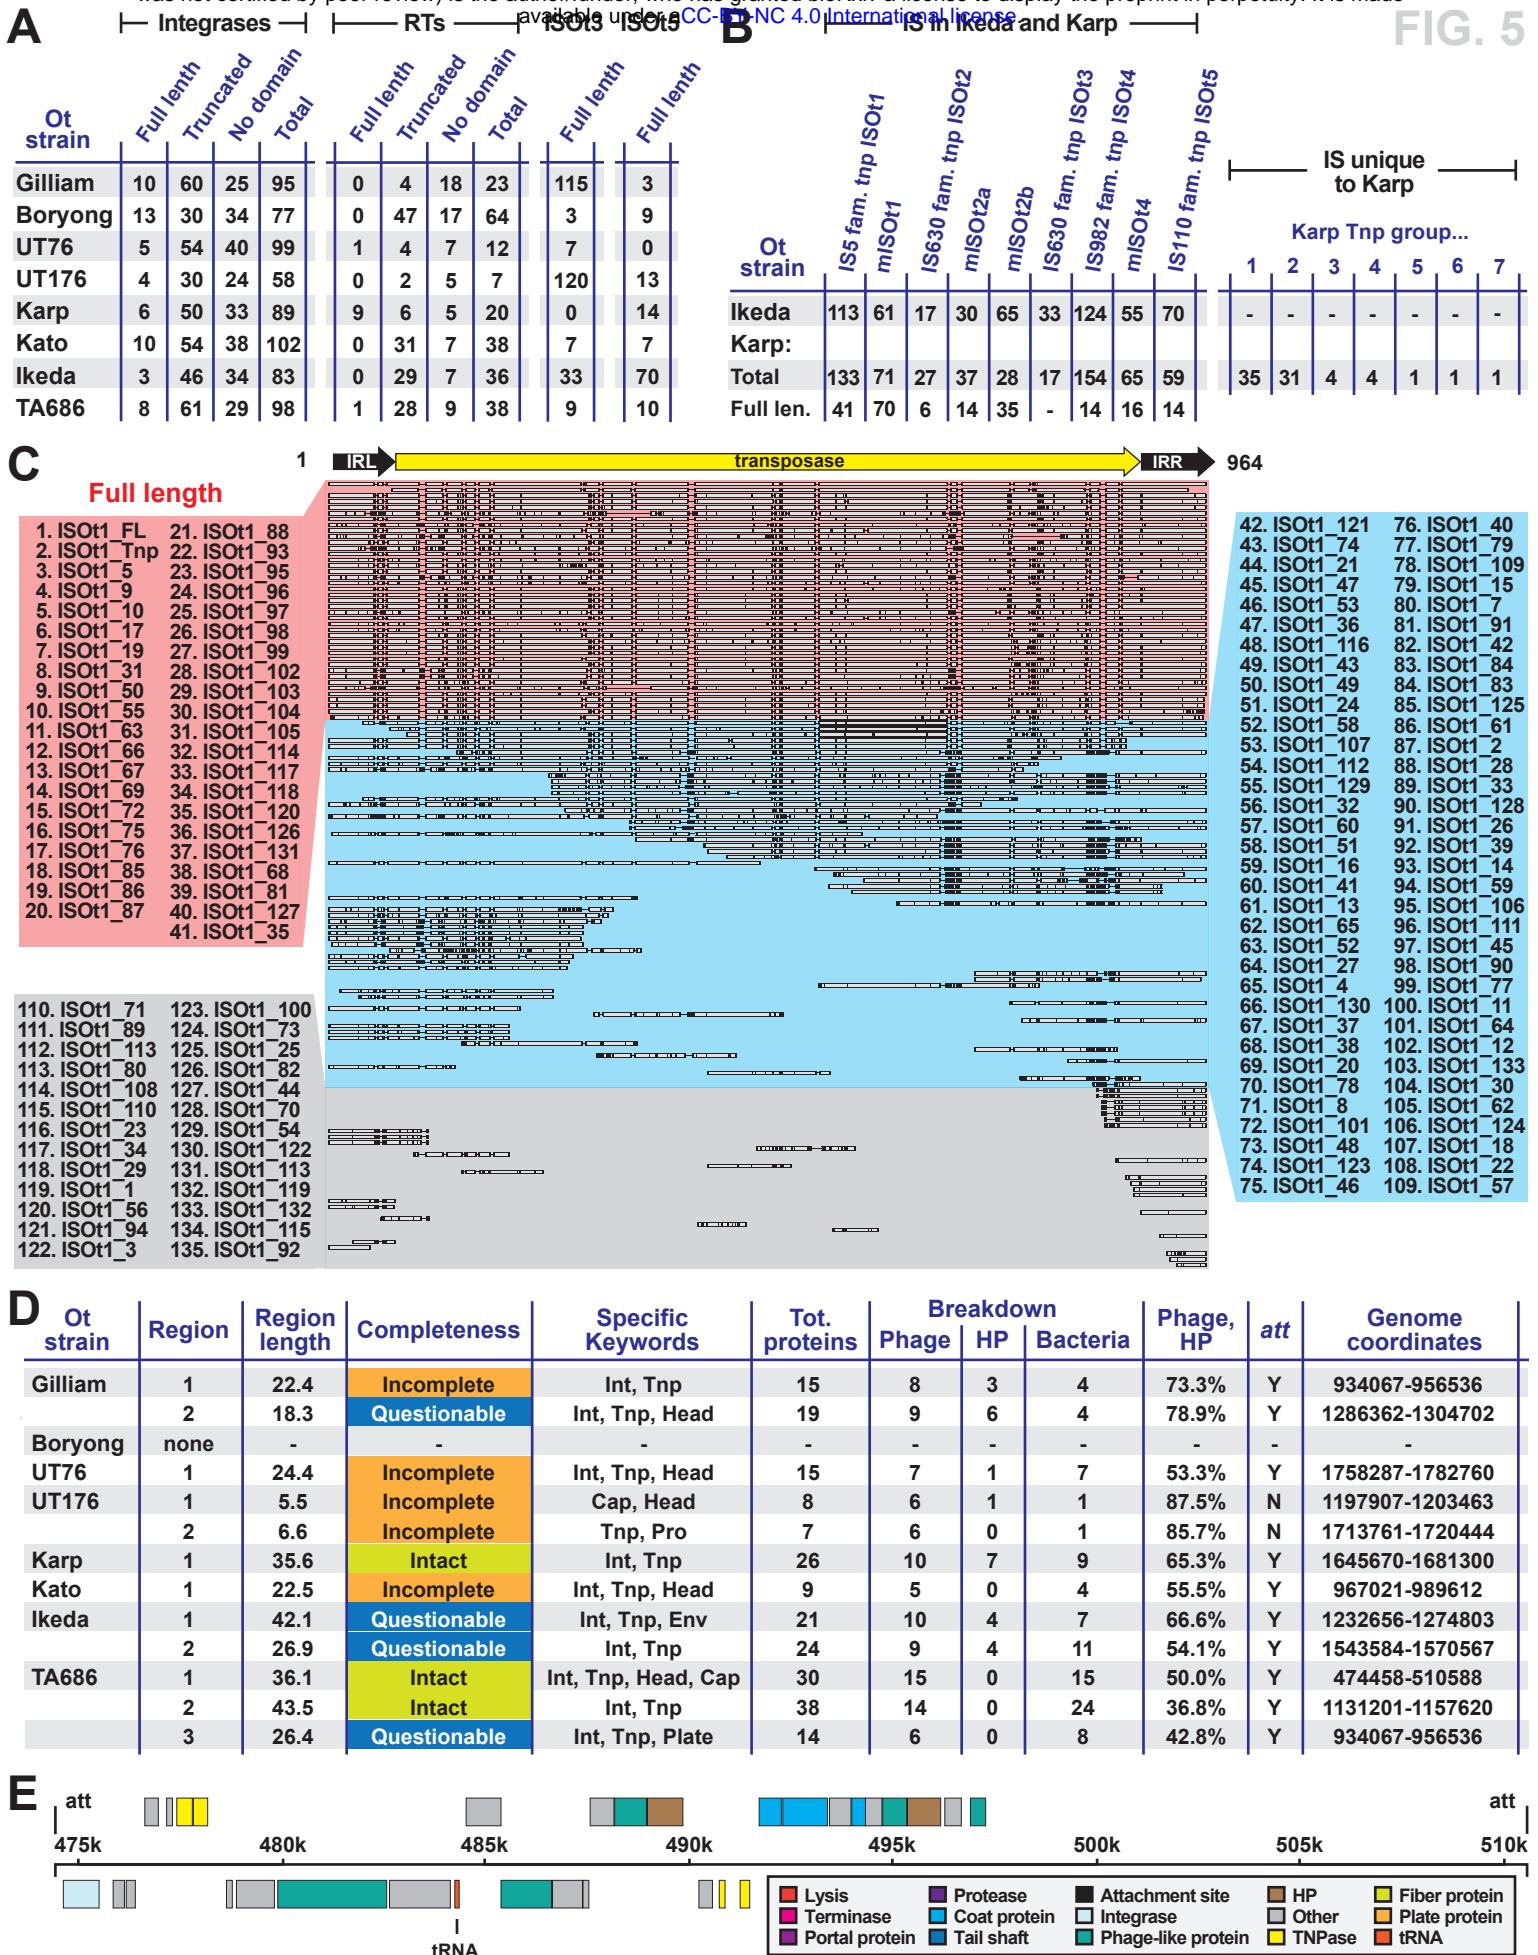

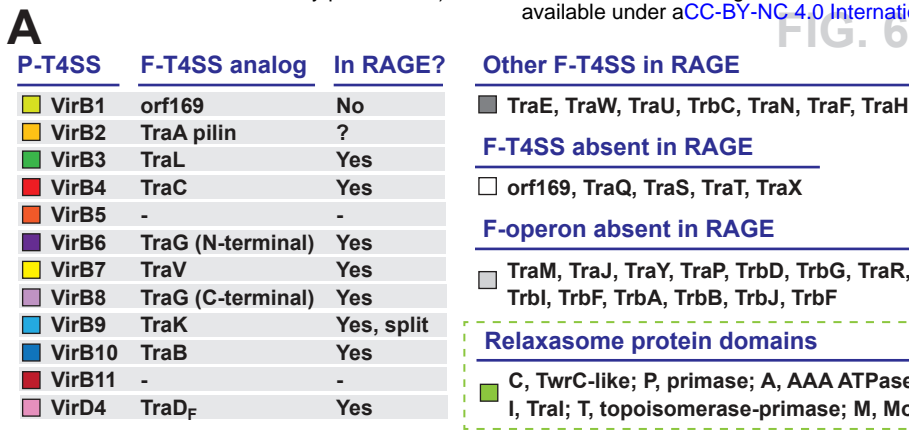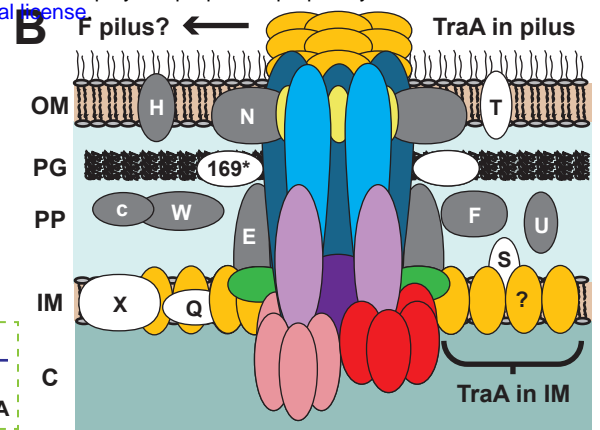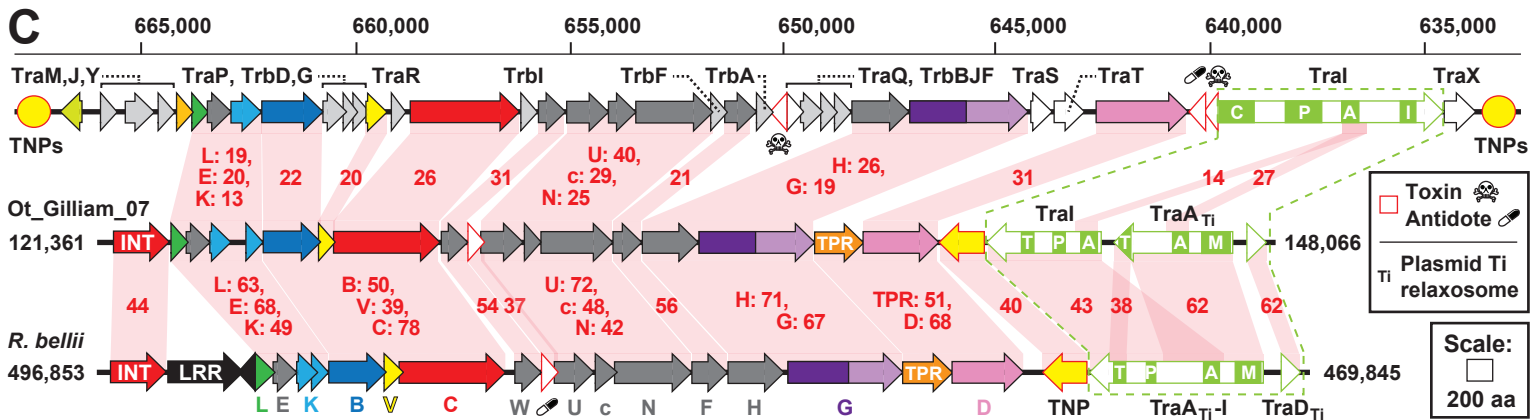

**D**

|                    | ● Gilliam (3/7/81) |     |      | ○ Boryong (0/1/83) |     |      | ● UT76 (0/2/69) |     |      | ○ UT176 (0/3/69) |     |      | ● Karp (1/13/65) |     |      | ● Kato (1/10/70) |     |      | ○ Ikeda (0/0/76) |     |      | ○ TA686 (0/7/86) |     |      |
|--------------------|--------------------|-----|------|--------------------|-----|------|-----------------|-----|------|------------------|-----|------|------------------|-----|------|------------------|-----|------|------------------|-----|------|------------------|-----|------|
|                    | full               | t/d | tot. | full               | t/d | tot. | full            | t/d | tot. | full             | t/d | tot. | full             | t/d | tot. | full             | t/d | tot. | full             | t/d | tot. | full             | t/d | tot. |
| TraE               | 7                  | 34  | 41   | 16                 | 22  | 38   | 5               | 45  | 50   | 6                | 25  | 31   | 11               | 43  | 54   | 7                | 40  | 47   | 8                | 33  | 41   | 2                | 55  | 57   |
| TraB               | 17                 | 23  | 40   | 1                  | 38  | 39   | 5               | 34  | 39   | 5                | 17  | 22   | 9                | 27  | 36   | 8                | 25  | 33   | 2                | 35  | 37   | 10               | 18  | 28   |
| TraV               | 24                 | 5   | 29   | 4                  | 24  | 28   | 17              | 6   | 23   | 14               | 3   | 17   | 15               | 3   | 18   | 17               | 3   | 20   | 11               | 5   | 16   | 12               | 0   | 12   |
| TraC               | 6                  | 38  | 44   | 0                  | 27  | 27   | 5               | 46  | 51   | 6                | 32  | 38   | 8                | 28  | 36   | 8                | 43  | 51   | 1                | 33  | 34   | 4                | 30  | 34   |
| TraW               | 12                 | 3   | 15   | 4                  | 3   | 7    | 7               | 2   | 9    | 3                | 2   | 5    | 14               | 3   | 17   | 12               | 8   | 20   | 5                | 2   | 7    | 6                | 1   | 7    |
| TraU               | 9                  | 20  | 29   | 0                  | 48  | 48   | 7               | 20  | 27   | 5                | 10  | 15   | 14               | 14  | 28   | 16               | 14  | 30   | 6                | 15  | 21   | 8                | 10  | 18   |
| TrbC               | 24                 | 0   | 24   | 1                  | 22  | 23   | 10              | 8   | 18   | 6                | 4   | 10   | 21               | 3   | 24   | 16               | 1   | 17   | 5                | 9   | 14   | 8                | 9   | 17   |
| TraN               | 12                 | 20  | 32   | 7                  | 39  | 46   | 7               | 32  | 39   | 4                | 28  | 32   | 15               | 18  | 33   | 14               | 20  | 34   | 6                | 23  | 29   | 10               | 17  | 27   |
| TraF               | 21                 | 3   | 24   | 2                  | 45  | 47   | 9               | 25  | 34   | 8                | 16  | 24   | 18               | 11  | 29   | 14               | 9   | 23   | 7                | 13  | 20   | 12               | 9   | 21   |
| TraH               | 7                  | 32  | 39   | 0                  | 45  | 45   | 4               | 41  | 45   | 2                | 28  | 30   | 6                | 39  | 45   | 4                | 50  | 54   | 2                | 39  | 41   | 2                | 33  | 35   |
| TraG               | 9                  | 22  | 31   | 0                  | 38  | 38   | 10              | 18  | 28   | 5                | 13  | 18   | 9                | 23  | 32   | 13               | 14  | 27   | 1                | 22  | 23   | 9                | 17  | 26   |
| TraD               | 16                 | 23  | 39   | 1                  | 40  | 41   | 8               | 32  | 40   | 2                | 39  | 41   | 14               | 34  | 48   | 11               | 31  | 42   | 4                | 23  | 27   | 7                | 31  | 38   |
| TraI               | 15                 | 34  | 49   | 0                  | 41  | 41   | 5               | 26  | 31   | 5                | 16  | 21   | 3                | 61  | 64   | 13               | 20  | 33   | 3                | 26  | 29   | 6                | 45  | 51   |
| TraA <sub>Ti</sub> | 14                 | 72  | 86   | 2                  | 85  | 87   | 9               | 53  | 62   | 5                | 36  | 41   | 8                | 71  | 79   | 7                | 61  | 68   | 1                | 71  | 72   | 5                | 65  | 70   |
| TraD <sub>Ti</sub> | 27                 | 16  | 43   | 4                  | 45  | 49   | 20              | 14  | 34   | 11               | 14  | 25   | 21               | 39  | 60   | 20               | 21  | 41   | 22               | 13  | 35   | 23               | 21  | 44   |
| Sum                | 220                | 345 | 565  | 42                 | 562 | 604  | 128             | 402 | 530  | 87               | 283 | 370  | 186              | 417 | 603  | 180              | 360 | 540  | 84               | 362 | 446  | 124              | 361 | 485  |

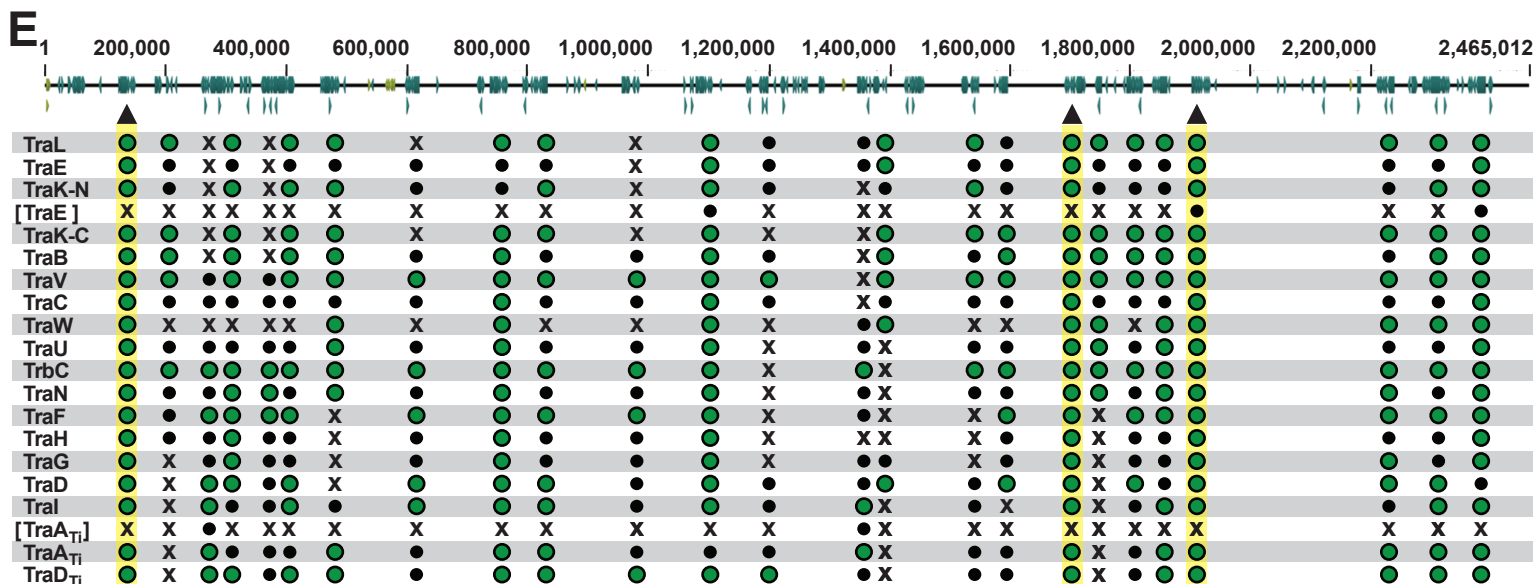



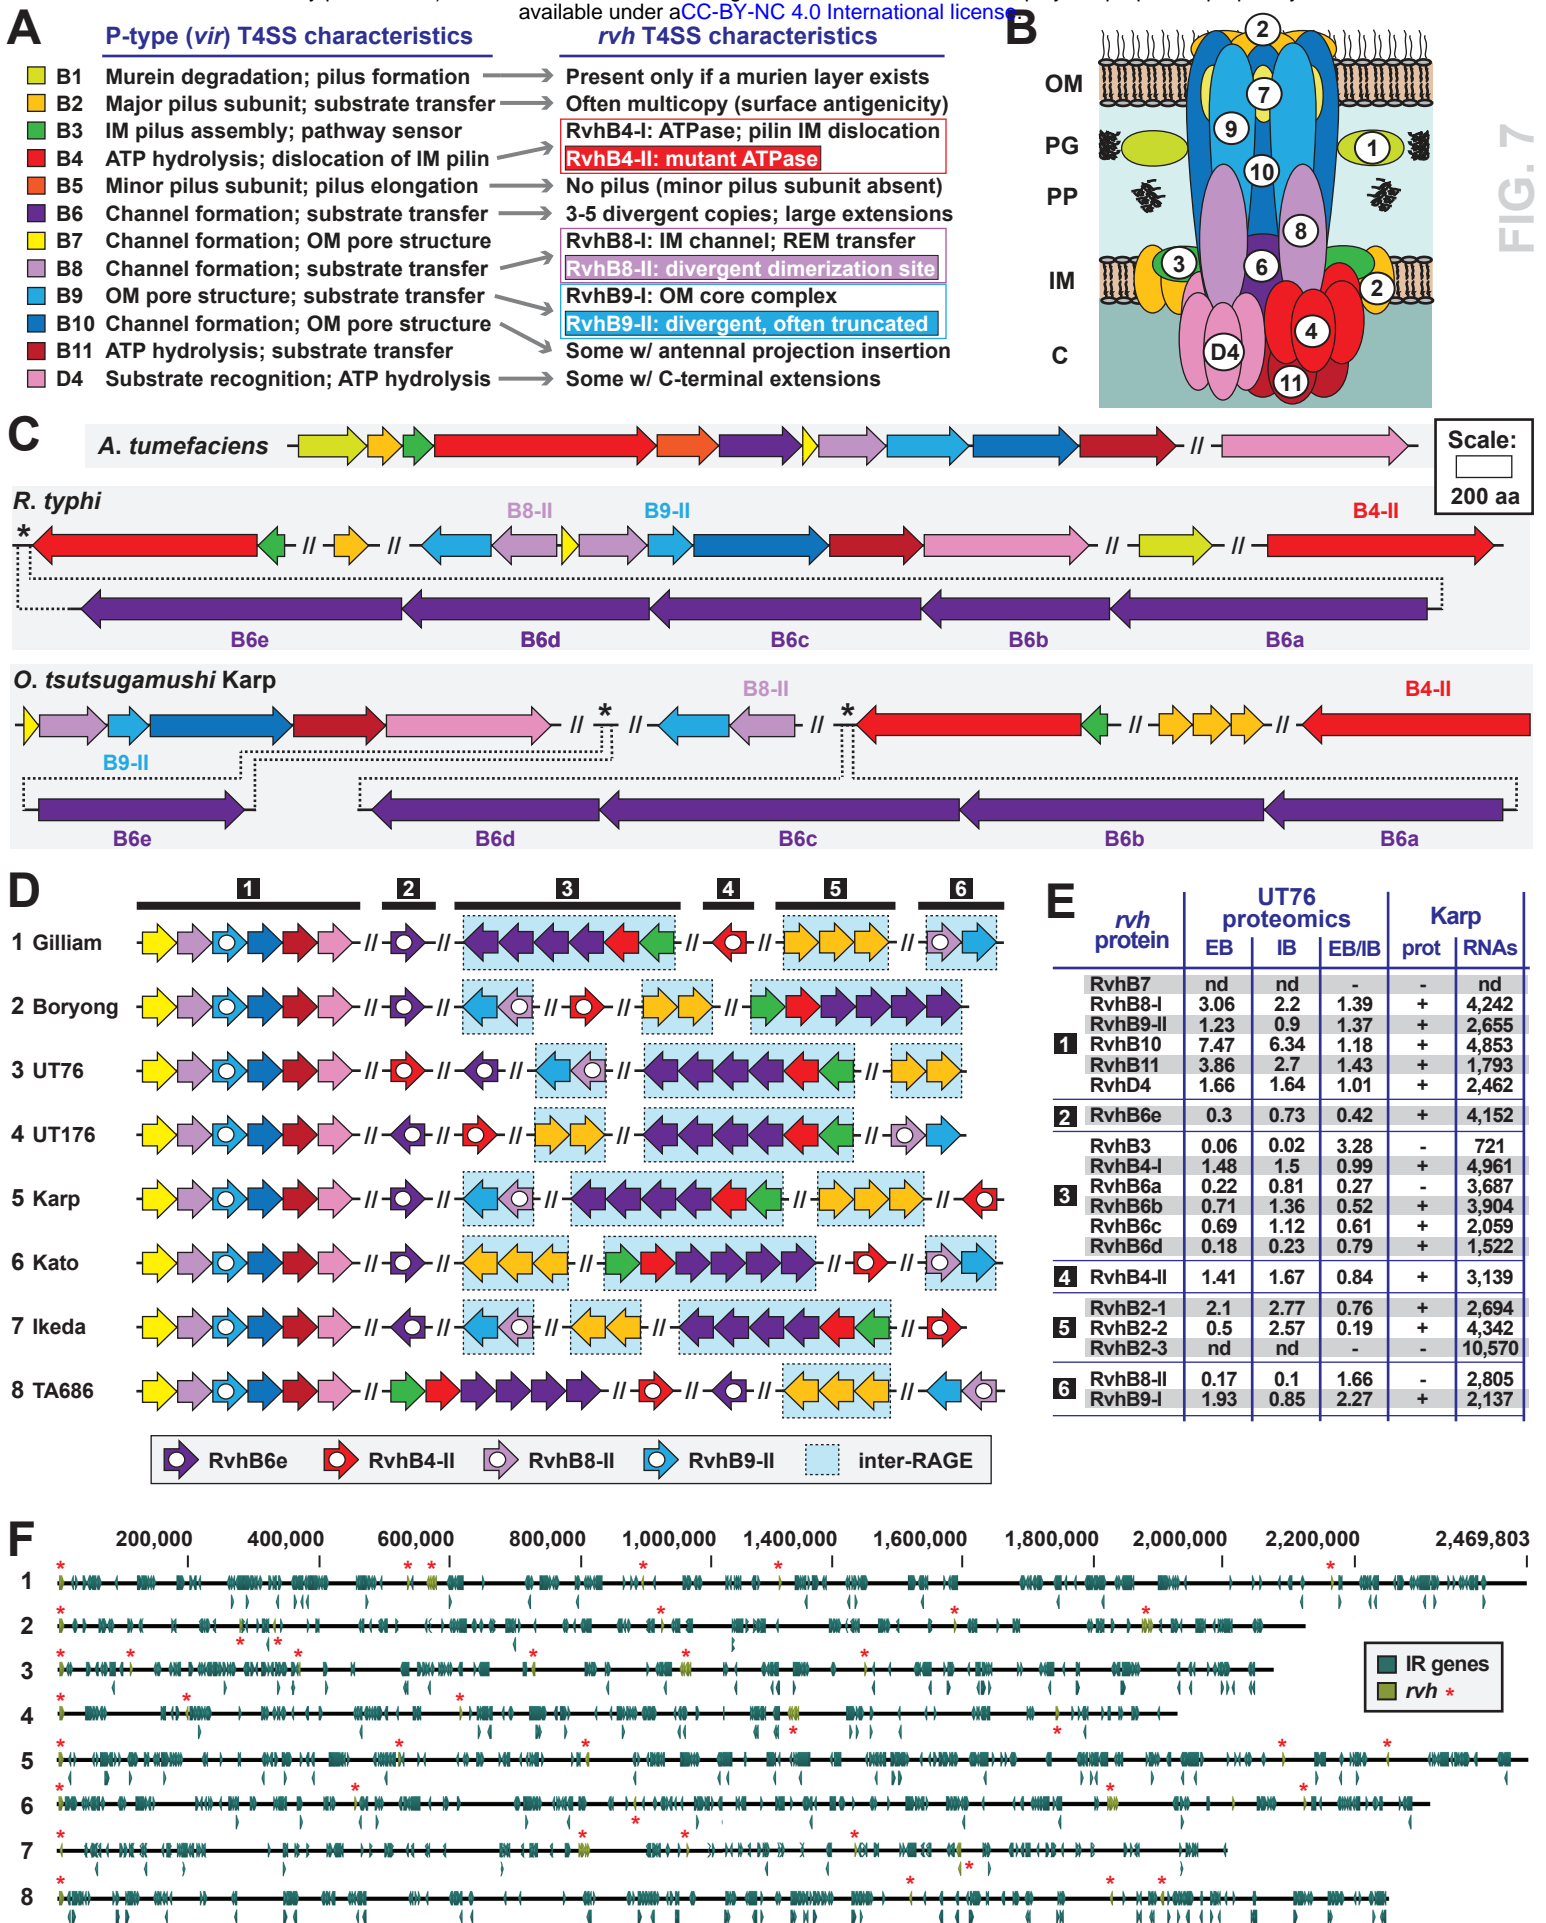

Source: https://www.biorxiv.org/content/10.1101/2023.05.11.540415v1.full.pdf
